# Supplementary material for: Single-cell copy number variant detection reveals the dynamics and diversity of adaptation
Source: PubMed Central journal article supplement (PMC6298651; doi:10.1371/journal.pbio.3000069), 2018-12-18
Supplement: pbio.3000069.s001.pdf [file pbio.3000069.s001.pdf]

# Single-cell copy number variant detection reveals the dynamics and diversity of adaptation: S1 Text

*Stephanie Lauer, Grace Avecilla, Pieter Spealman, Gunjan Sethia, Nathan Brandt, Sasha Levy and David Gresham*

*Compiled 2018-10-31*

## Contents

- 1 Quantification of CNV subpopulation dynamics for original evolution experiment** **1**
- 2 Quantification of CNV subpopulation dynamics for barcode evolution experiment** **10**

We performed linear regression to determine the relative fitness of the CNV subpopulation in each evolving population. The linear phase was determined using the variance explained ( $R^2$ ) as indicated for each population below.

## 1 Quantification of CNV subpopulation dynamics for original evolution experiment

```
##  
## Call:  
## lm(formula = logECNV_noCNV ~ Generation, data = test)  
##  
## Coefficients:  
## (Intercept)    Generation  
##    -7.21808      0.06588
```

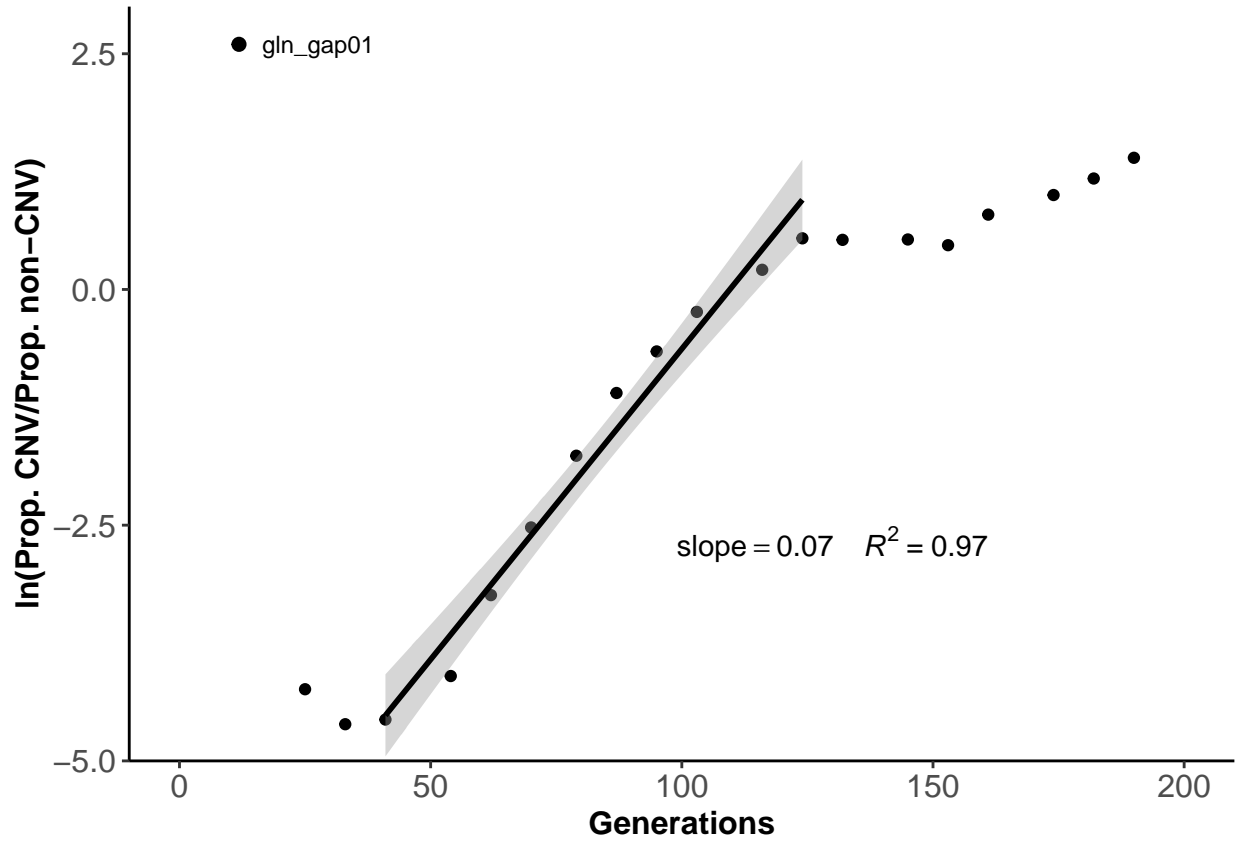

```
## [1] 0.003828795
##           2.5 %    97.5 %
## Generation 0.05705222 0.07471065
##
## Call:
## lm(formula = logECNV_noCNV ~ Generation, data = test)
##
## Coefficients:
## (Intercept)  Generation
##    -7.9143      0.0711
```

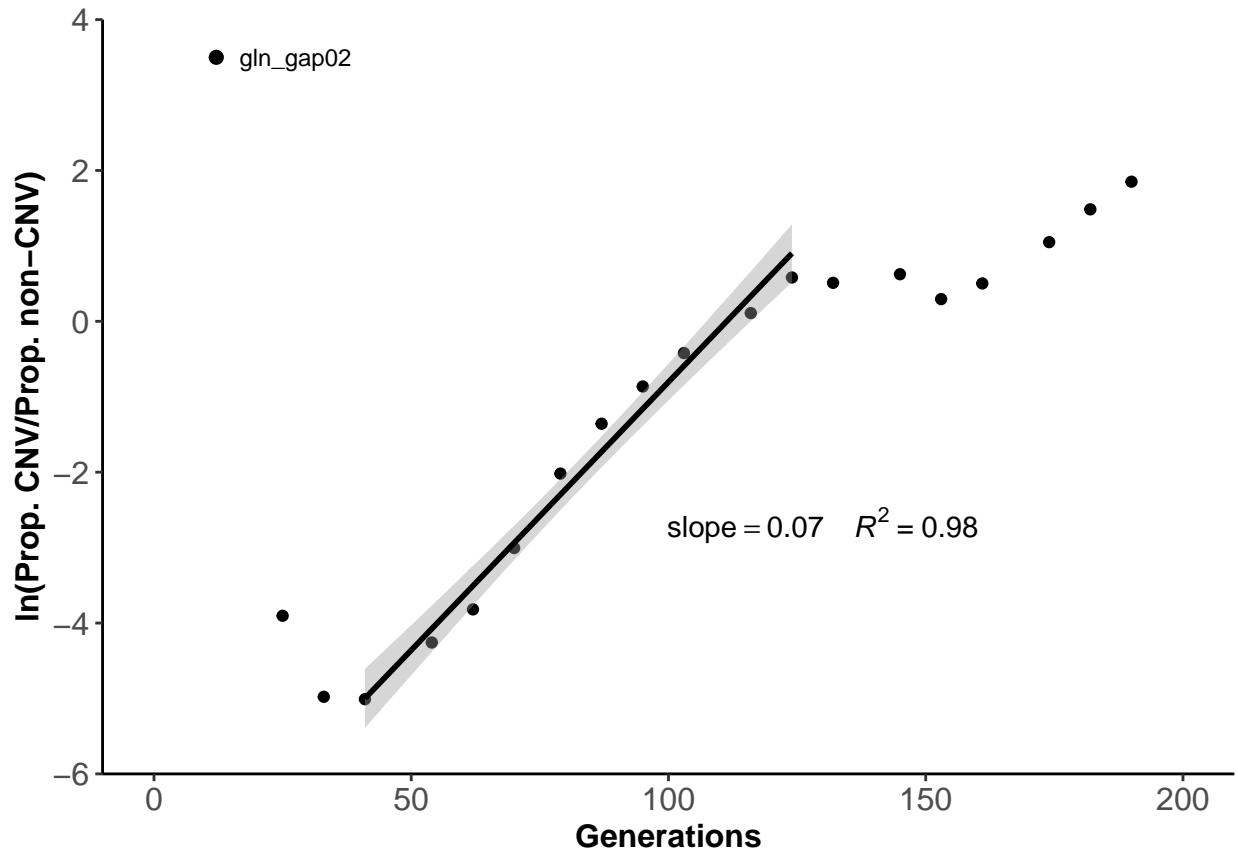

```
## [1] 0.003440376
##           2.5 %      97.5 %
## Generation 0.06316211 0.07902915
##
## Call:
## lm(formula = logECNV_noCNV ~ Generation, data = test)
##
## Coefficients:
## (Intercept)  Generation
##    -7.11582      0.07131
```

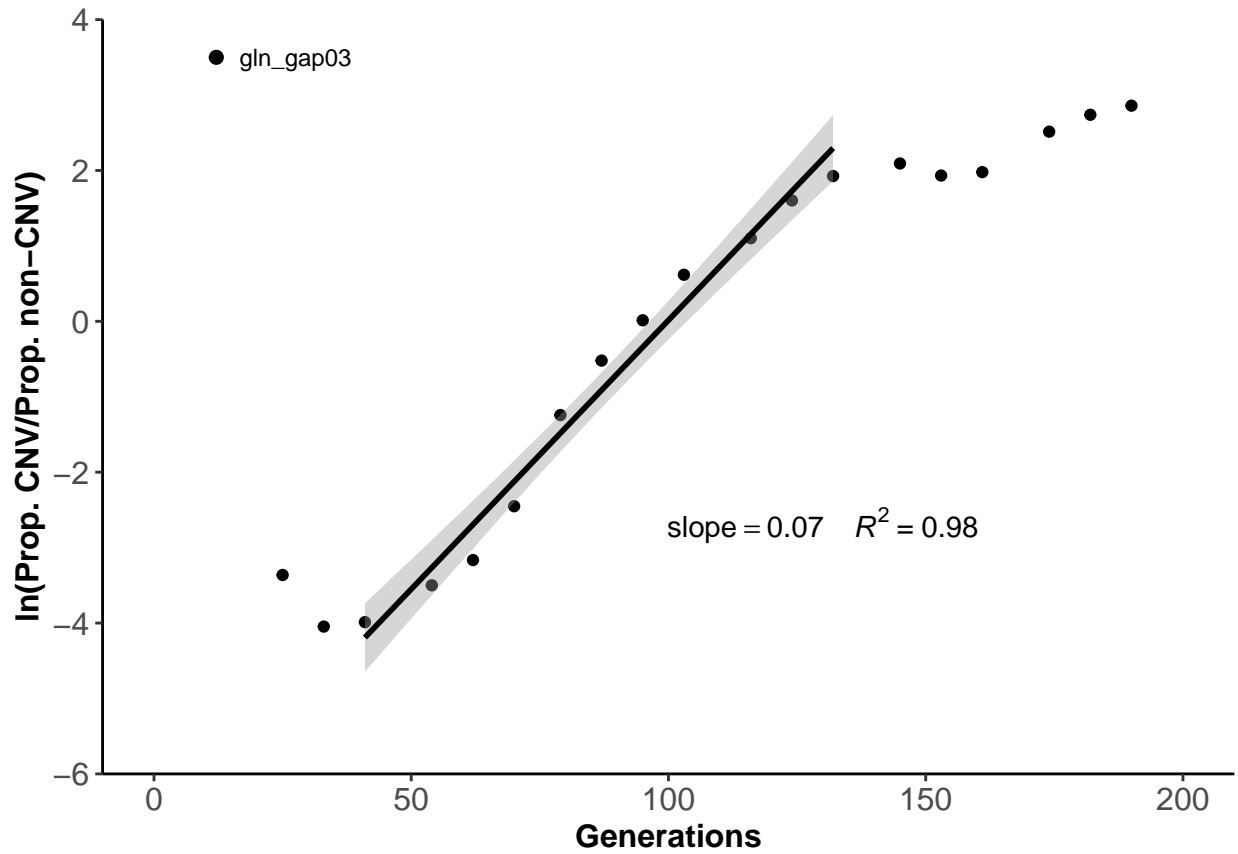

```
## [1] 0.003686966
##           2.5 %      97.5 %
## Generation 0.06296517 0.07964616
##
## Call:
## lm(formula = logECNV_noCNV ~ Generation, data = test)
##
## Coefficients:
## (Intercept)  Generation
##   -7.88506      0.07932
```

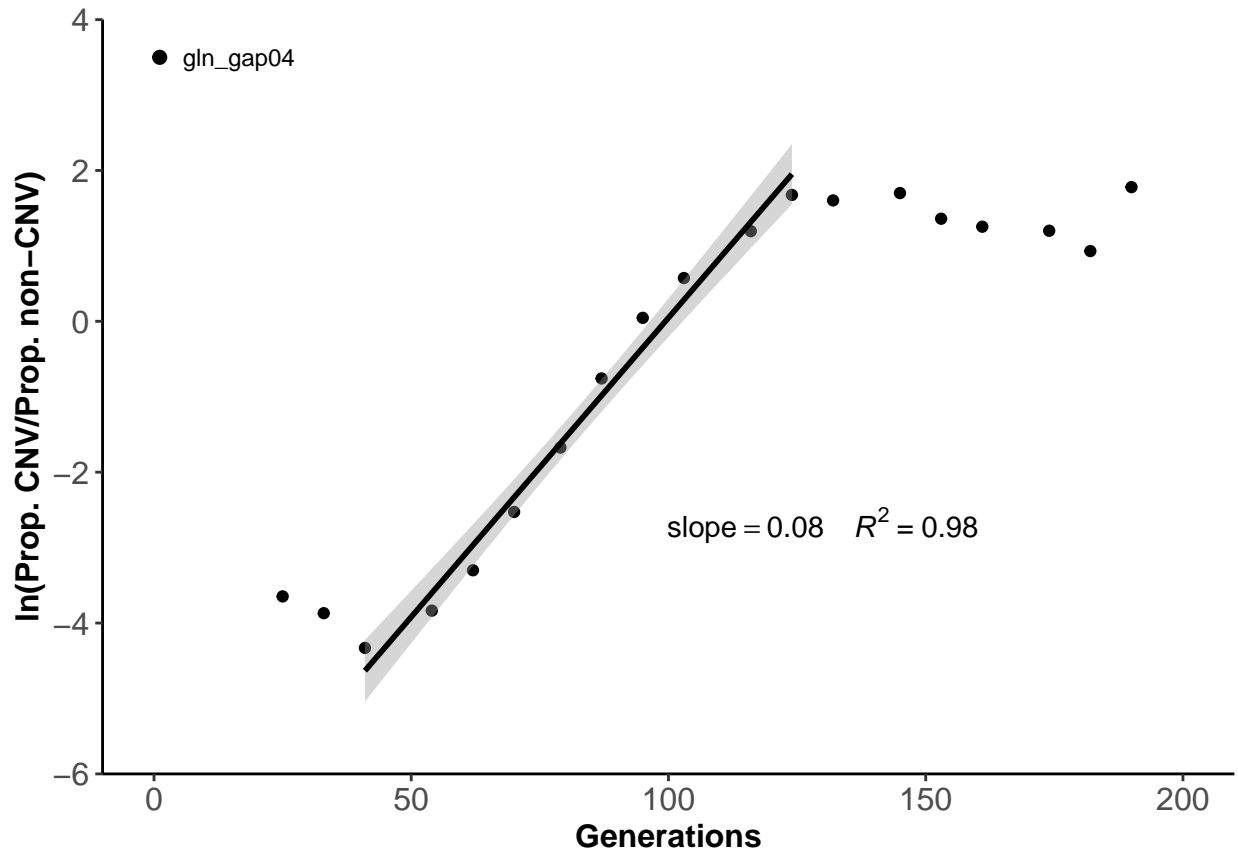

```
## [1] 0.003598147
##           2.5 %      97.5 %
## Generation 0.07102378 0.08761847
##
## Call:
## lm(formula = logECNV_noCNV ~ Generation, data = test)
##
## Coefficients:
## (Intercept)  Generation
##   -7.92949      0.07674
```

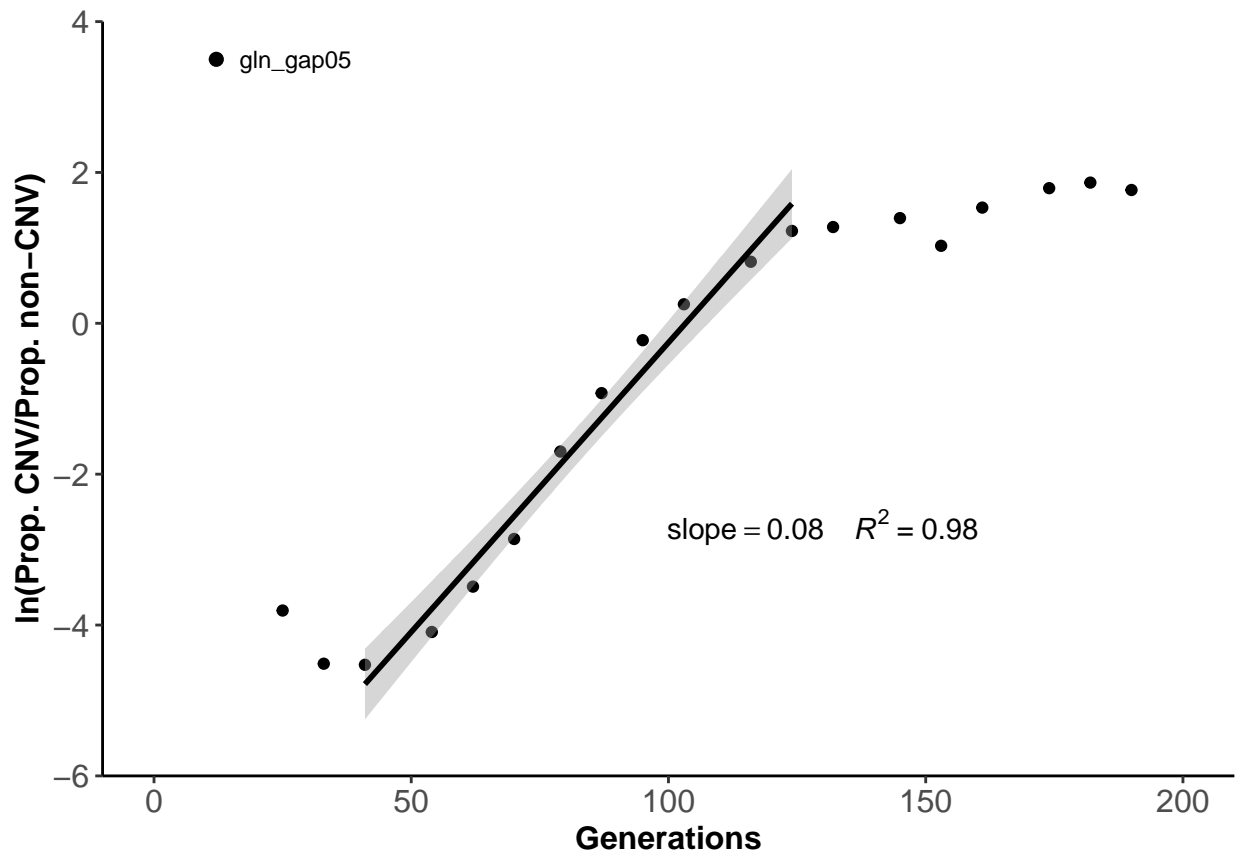

```
## [1] 0.004123018
##           2.5 %      97.5 %
## Generation 0.06723107 0.08624646
##
## Call:
## lm(formula = logECNV_noCNV ~ Generation, data = test)
##
## Coefficients:
## (Intercept)  Generation
##    -8.02689      0.08212
```

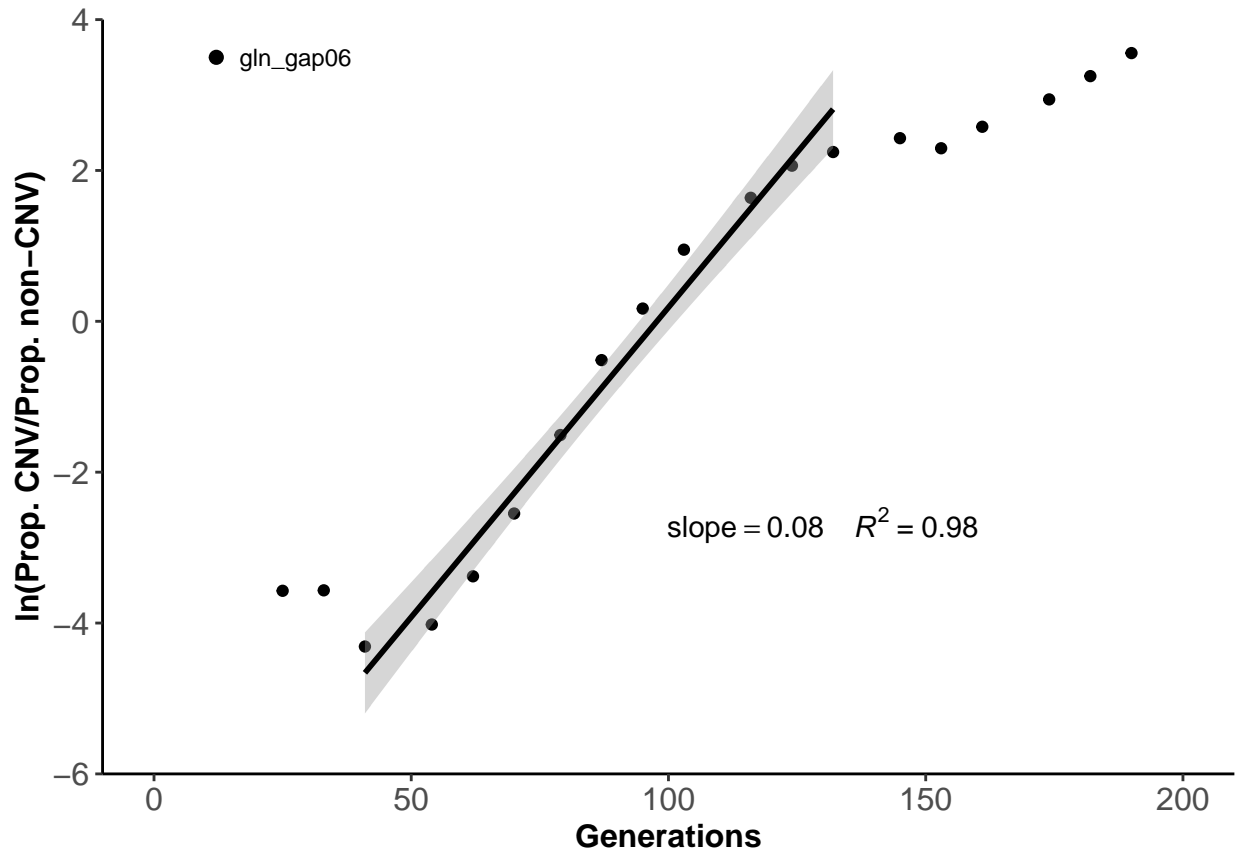

```
## [1] 0.004348782
##           2.5 %      97.5 %
## Generation 0.07227934 0.09195459
##
## Call:
## lm(formula = logECNV_noCNV ~ Generation, data = test)
##
## Coefficients:
## (Intercept)  Generation
##   -9.70093      0.09409
```

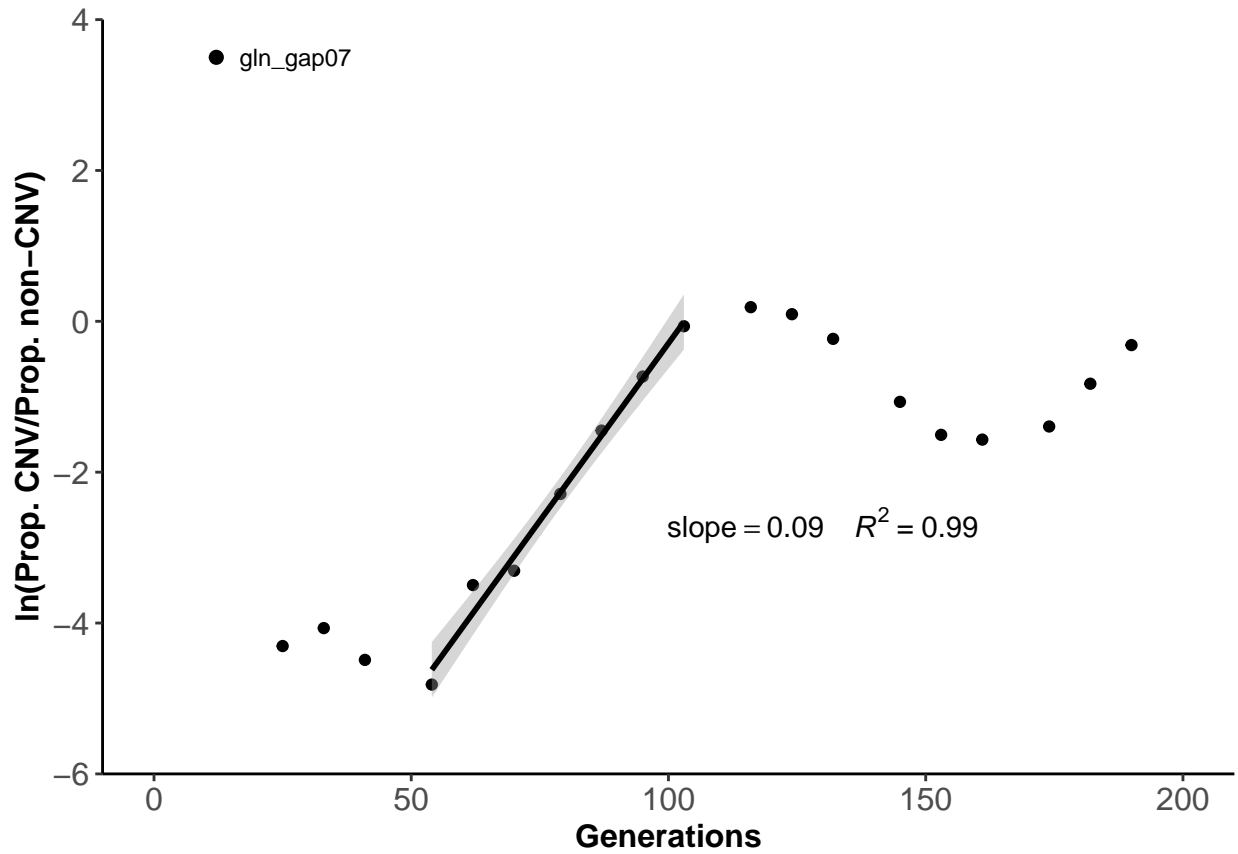

```
## [1] 0.004838433
##           2.5 %   97.5 %
## Generation 0.08165719 0.1065324
##
## Call:
## lm(formula = logECNV_noCNV ~ Generation, data = test)
##
## Coefficients:
## (Intercept)  Generation
##   -8.89468      0.08955
```



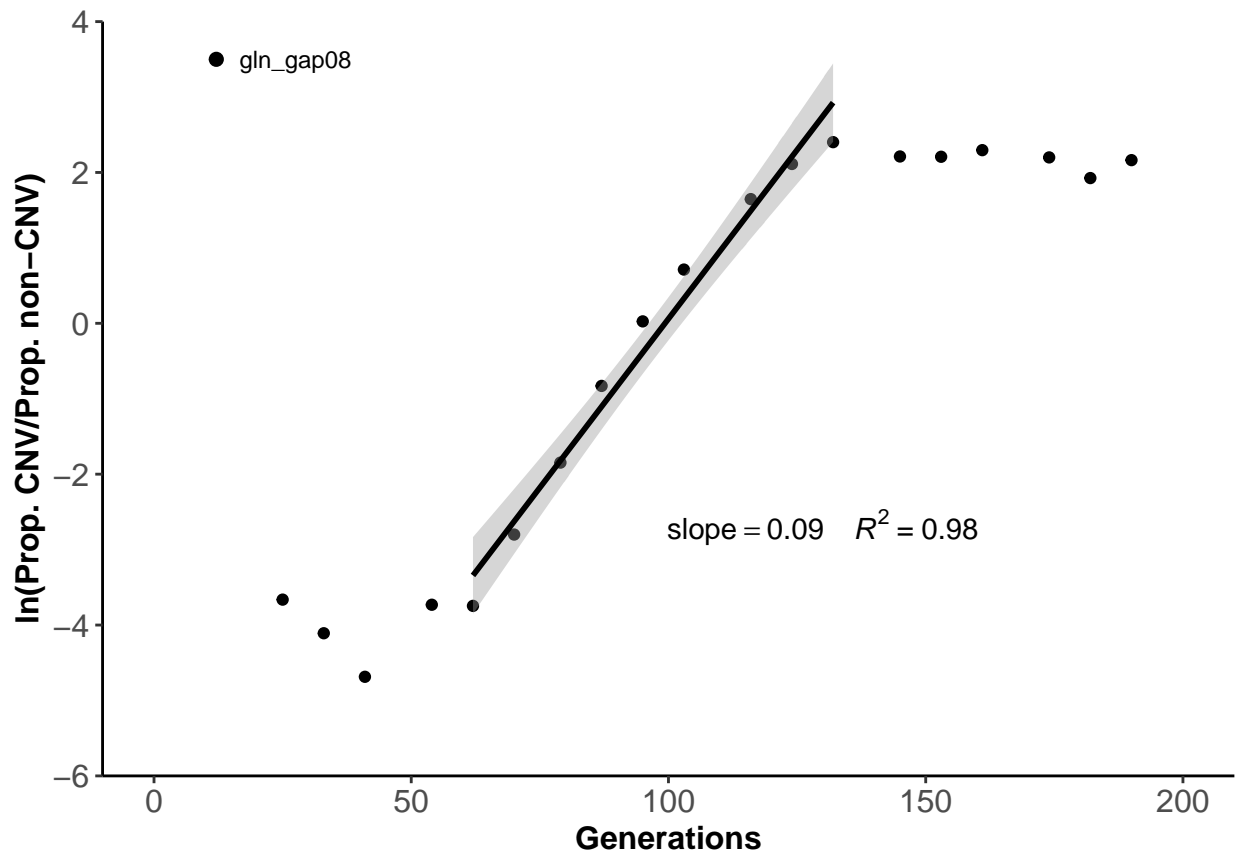

```
## [1] 0.00519789
##           2.5 %   97.5 %
## Generation 0.07725805 0.1018402
##
## Call:
## lm(formula = logECNV_noCNV ~ Generation, data = test)
##
## Coefficients:
## (Intercept)  Generation
##   -6.94183      0.06637
```

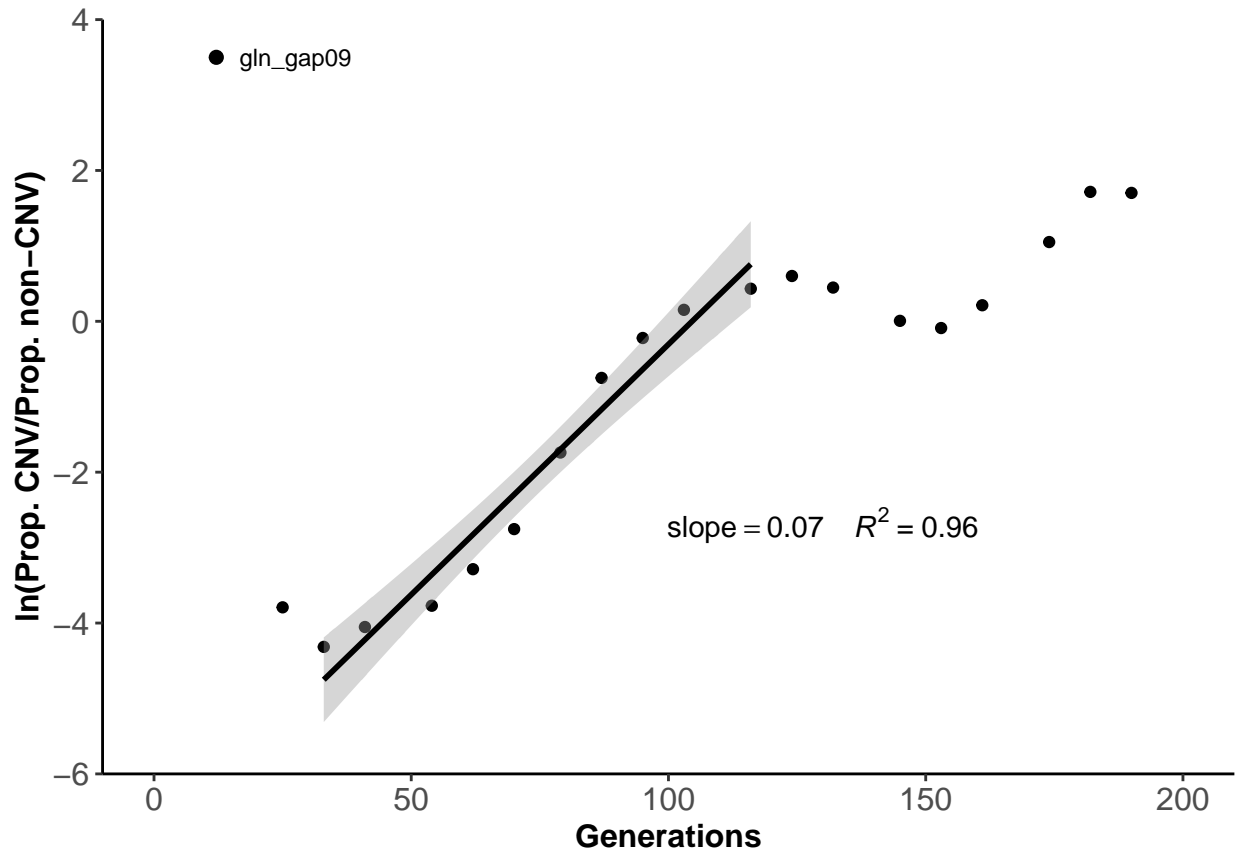

```
## [1] 0.00503076
##           2.5 %    97.5 %
## Generation 0.05476645 0.07796836
```

## 2 Quantification of CNV subpopulation dynamics for barcode evolution experiment

```
##
## Call:
## lm(formula = logECNV_noCNV ~ Generation, data = test)
##
## Coefficients:
## (Intercept)  Generation
##      -8.4747      0.1242
```

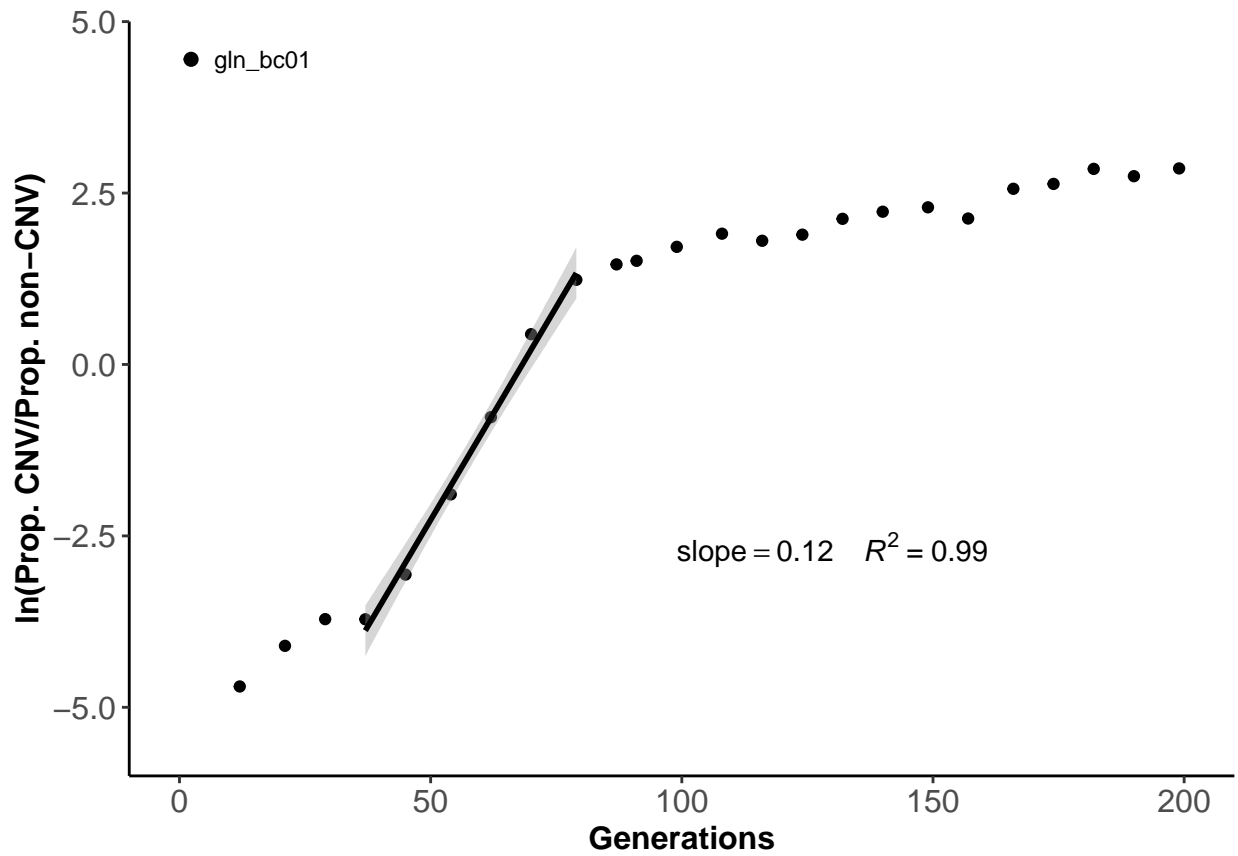

```
## [1] 0.005234006
##           2.5 %   97.5 %
## Generation 0.1096185 0.1386823
##
## Call:
## lm(formula = logECNV_noCNV ~ Generation, data = test)
##
## Coefficients:
## (Intercept)  Generation
##    -6.24177      0.07281
```

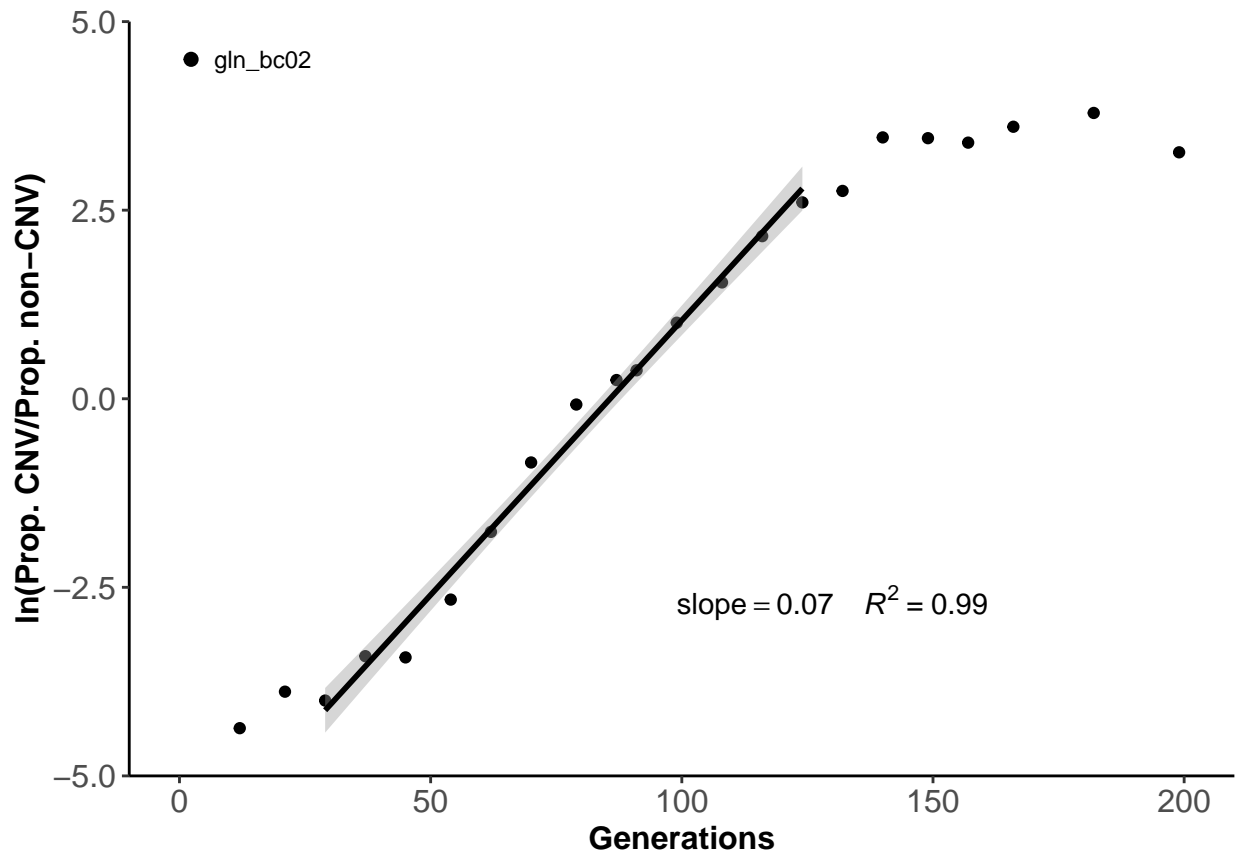

```
## [1] 0.002390899
##           2.5 %      97.5 %
## Generation 0.06755061 0.07807527
##
## Call:
## lm(formula = logECNV_noCNV ~ Generation, data = test)
##
## Coefficients:
## (Intercept)  Generation
##    -5.22360      0.06495
```

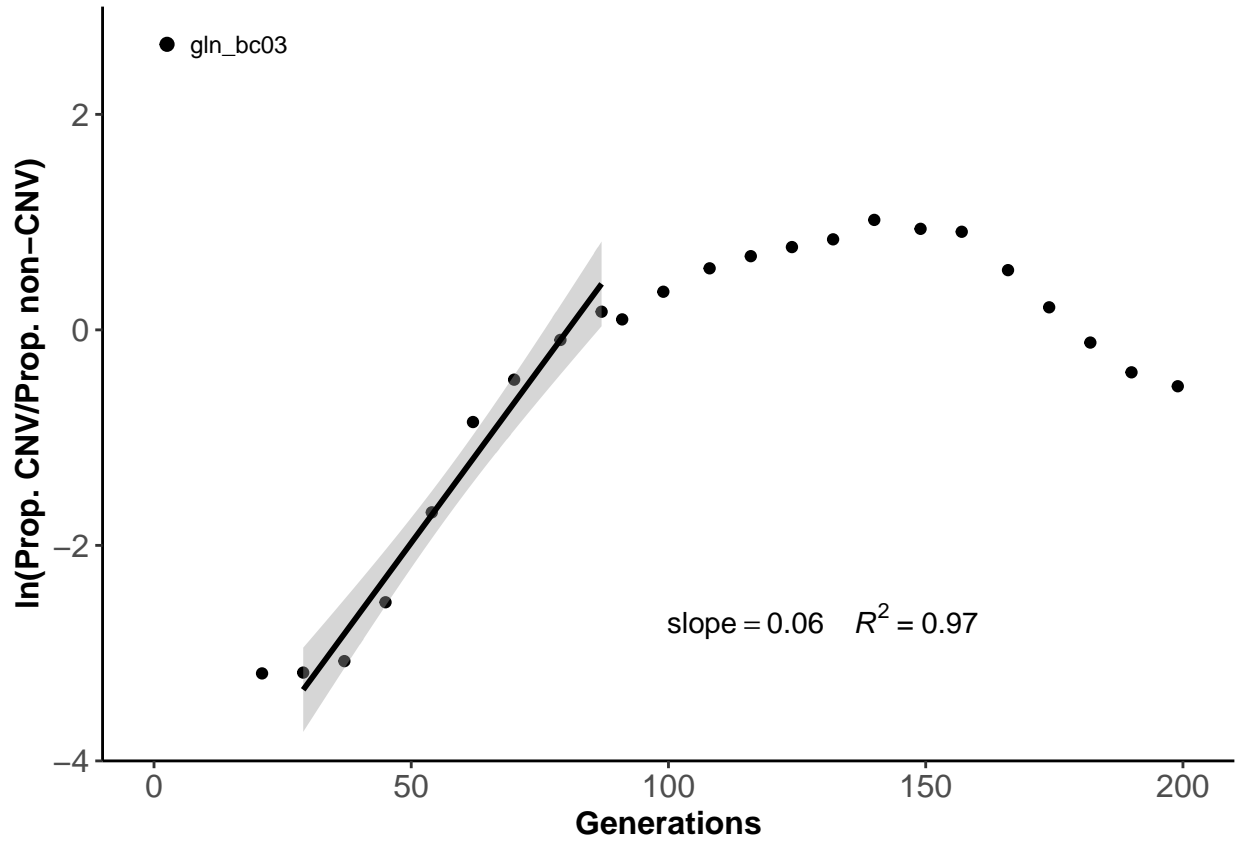

```
## [1] 0.004613785
##           2.5 %      97.5 %
## Generation 0.05365888 0.07623793
##
## Call:
## lm(formula = logECNV_noCNV ~ Generation, data = test)
##
## Coefficients:
## (Intercept)  Generation
##      -6.2100      0.0685
```

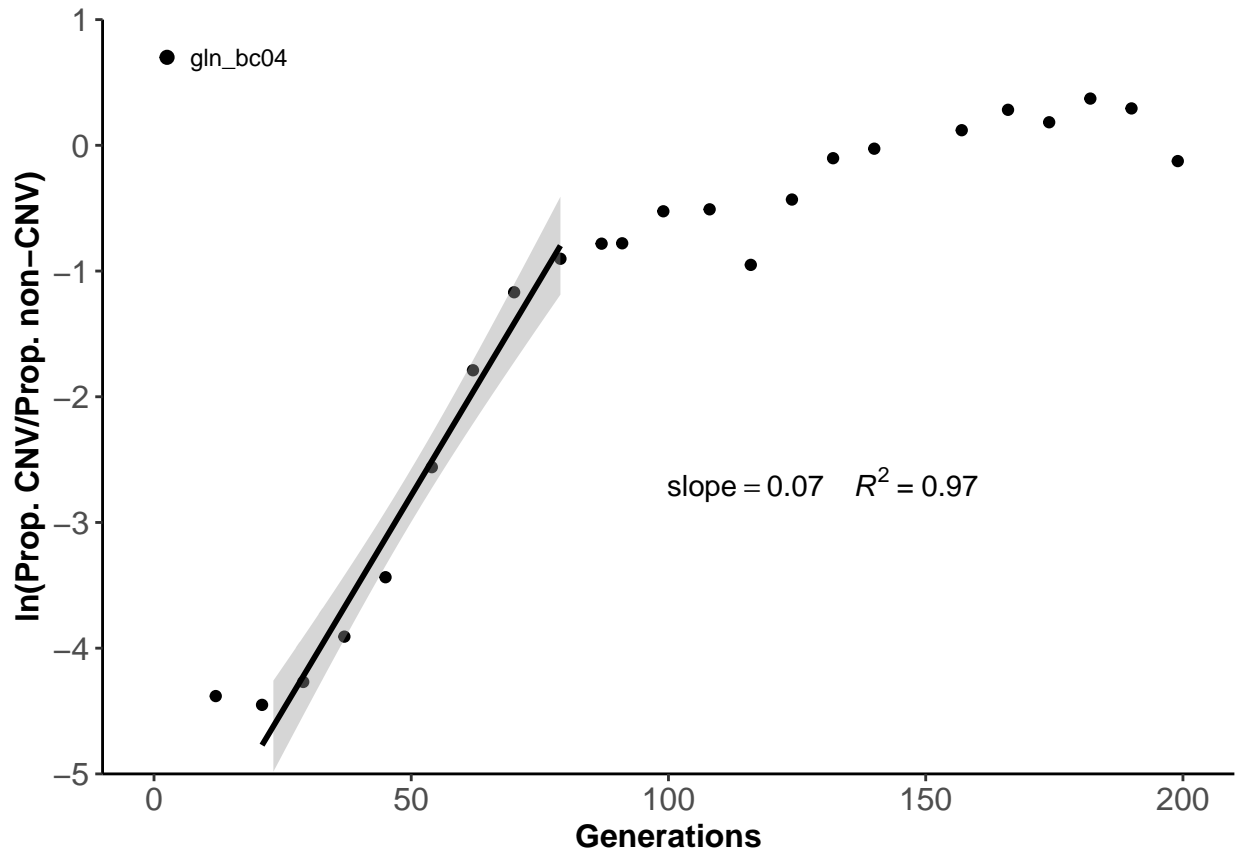

```
## [1] 0.004553106
##           2.5 %      97.5 %
## Generation 0.05736273 0.07964483
##
## Call:
## lm(formula = logECNV_noCNV ~ Generation, data = test)
##
## Coefficients:
## (Intercept)  Generation
##    -6.41715      0.08042
```

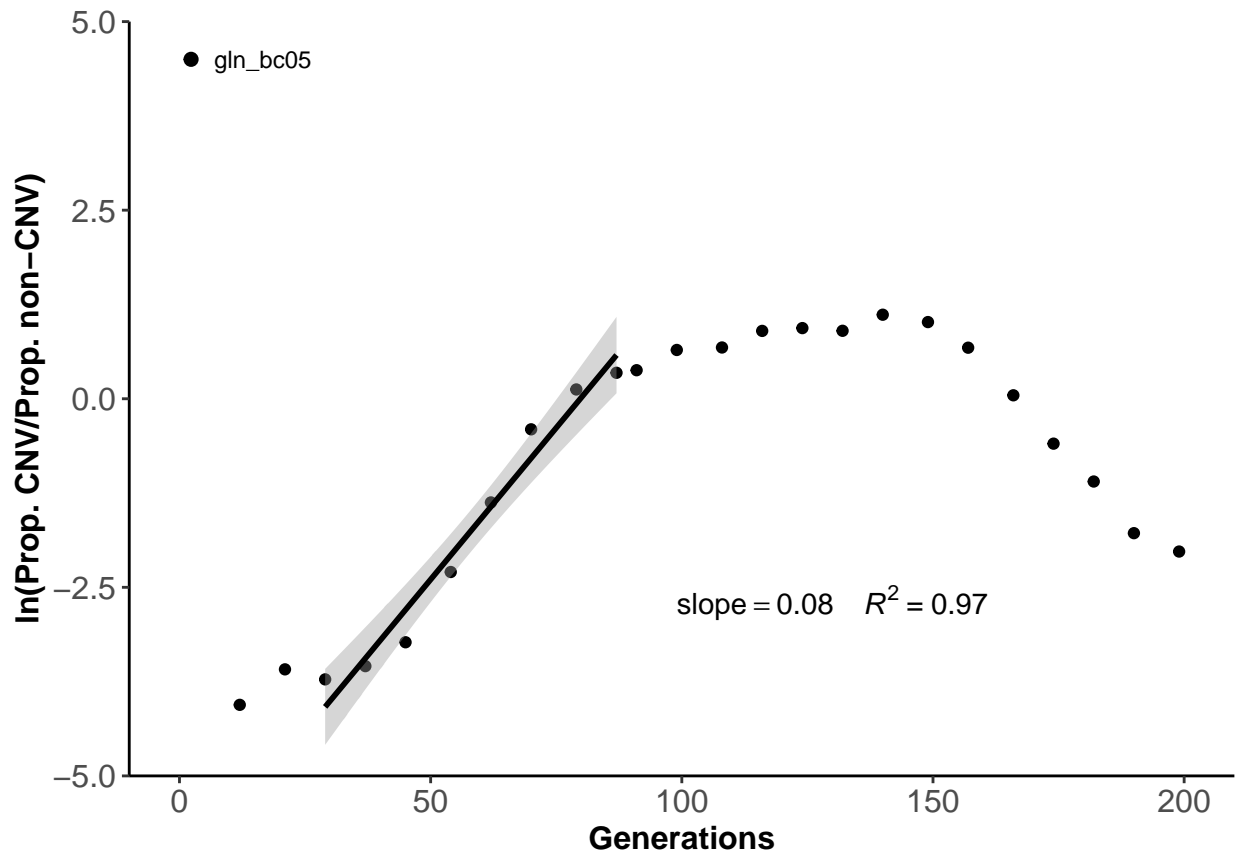

```
## [1] 0.00594899
##           2.5 %   97.5 %
## Generation 0.0658626 0.0949759
##
## Call:
## lm(formula = logECNV_noCNV ~ Generation, data = test)
##
## Coefficients:
## (Intercept)  Generation
##    -8.0400      0.0957
```

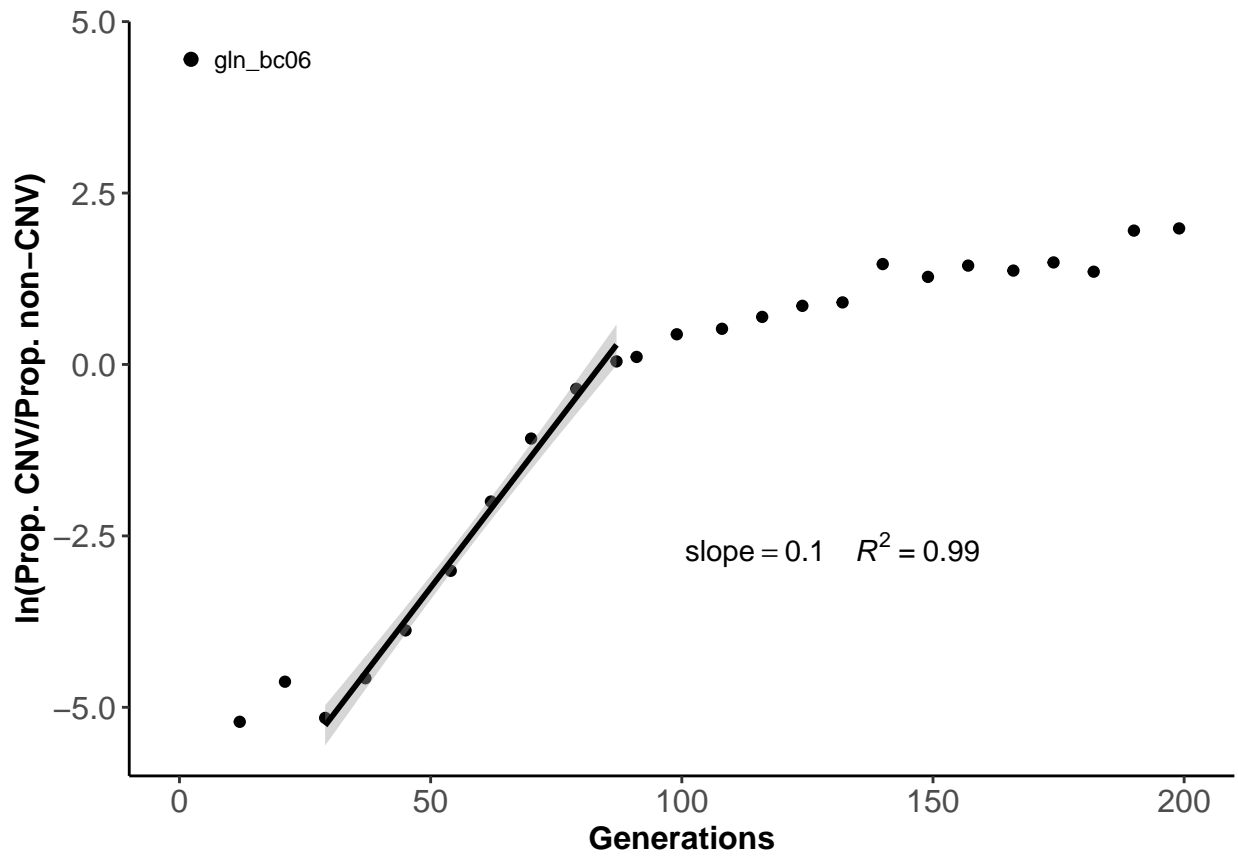

```
## [1] 0.003472746
##           2.5 %   97.5 %
## Generation 0.08720731 0.1042023
```
