# Supplementary material for: Single-cell copy number variant detection reveals the dynamics and diversity of adaptation
Source: PubMed Central journal article supplement (PMC6298651; doi:10.1371/journal.pbio.3000069), 2018-12-18

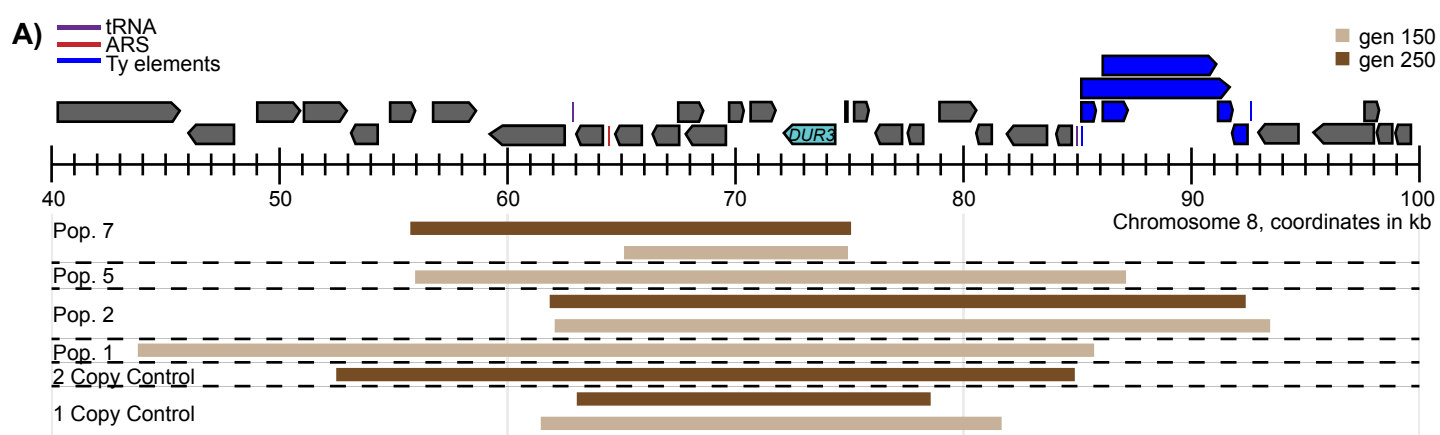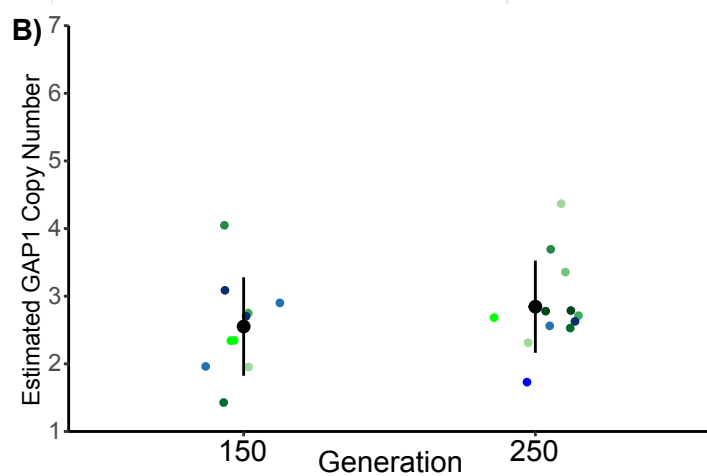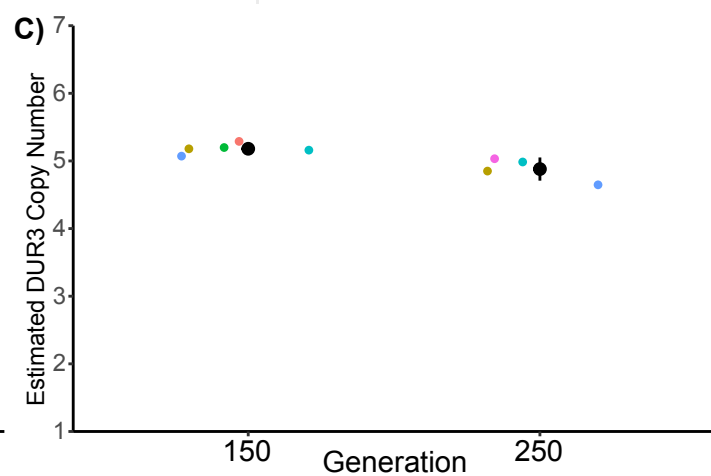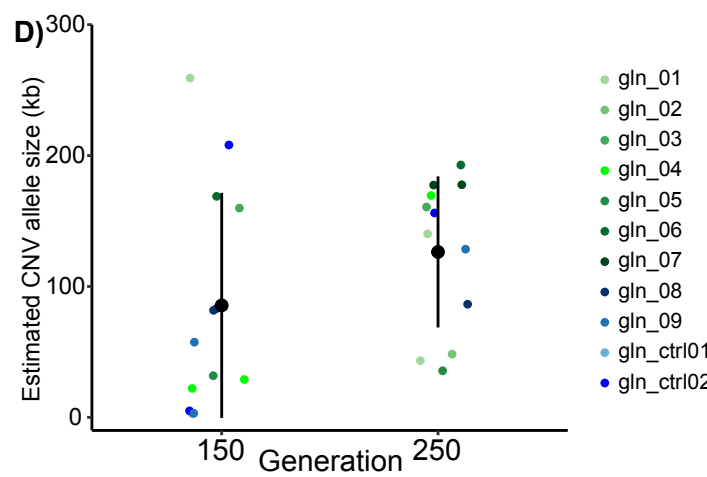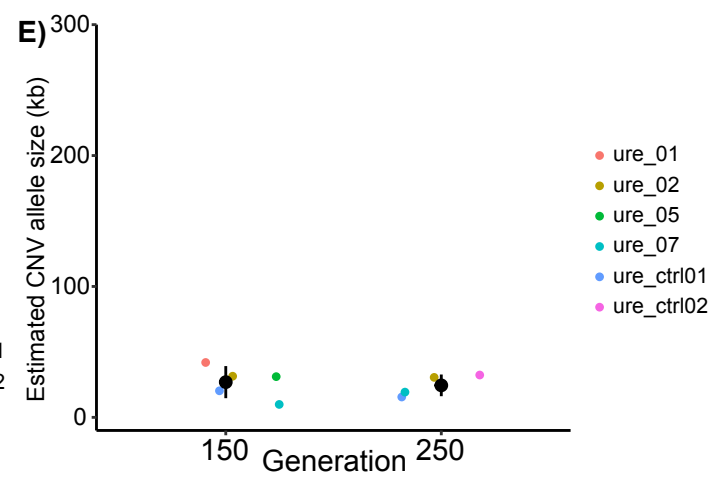

Supplement: pbio.3000069.s010.pdf [file pbio.3000069.s010.pdf]
