# Supplementary material for: Single-cell copy number variant detection reveals the dynamics and diversity of adaptation
Source: PubMed Central journal article supplement (PMC6298651; doi:10.1371/journal.pbio.3000069), 2018-12-18
Supplement: pbio.3000069.s017.pdf [file pbio.3000069.s017.pdf]

A)

BD FACSDiva 8.0.2

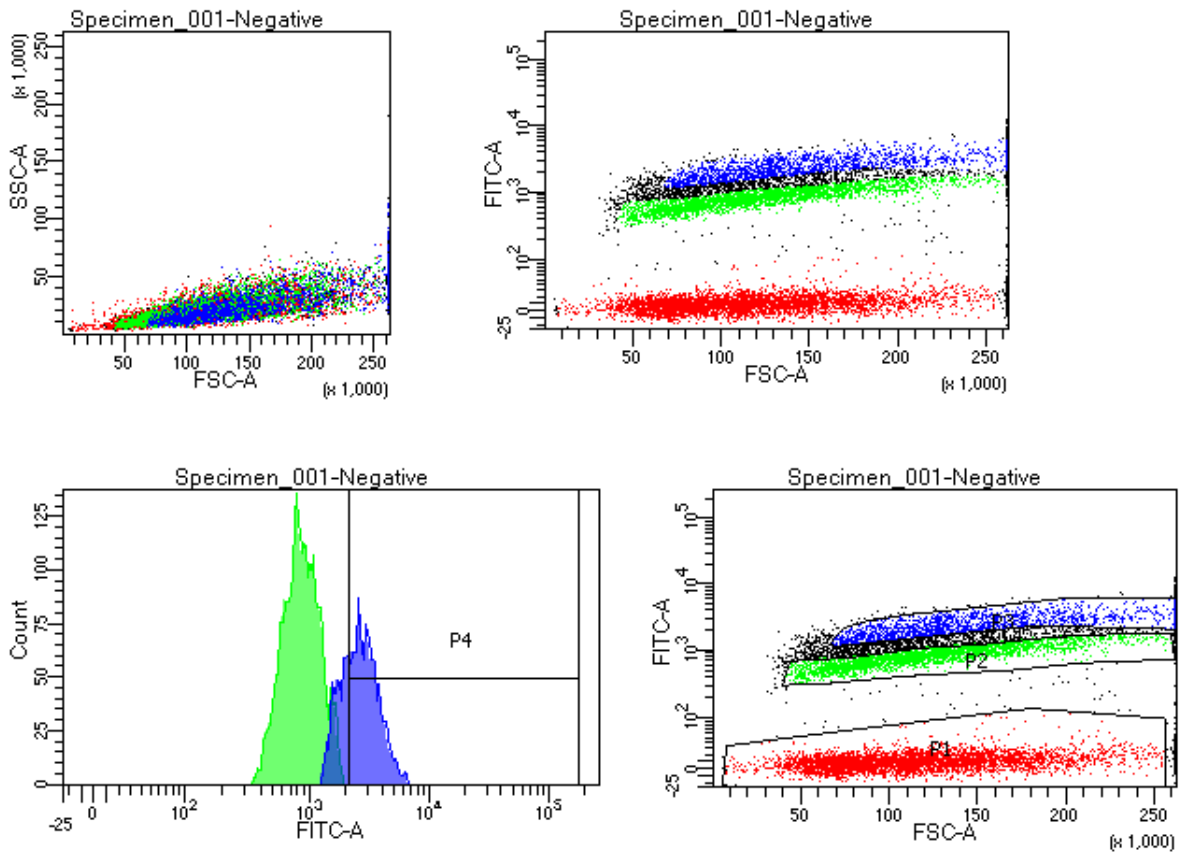

|                   |                         |                |
|-------------------|-------------------------|----------------|
| Experiment Name:  | Grace 2017-08-31        |                |
| Specimen Name:    | Specimen_001            |                |
| Tube Name:        | Negative                |                |
| Record Date:      | Aug 31, 2017 1:45:50 PM |                |
| SOP:              | Administrator           |                |
| <b>Population</b> | <b>#Events</b>          | <b>%Parent</b> |
| ■ All Events      | 10,000                  | ####           |
| ■ P1              | 3,937                   | 39.4           |
| ■ P2              | 2,680                   | 26.8           |
| ■ P3              | 1,656                   | 16.6           |
| ☒ P4              | 1,162                   | 11.6           |

B)

BD FACSDiva 8.0.2

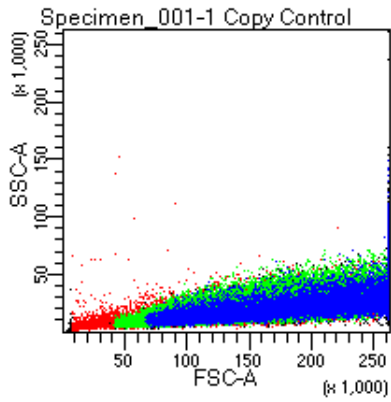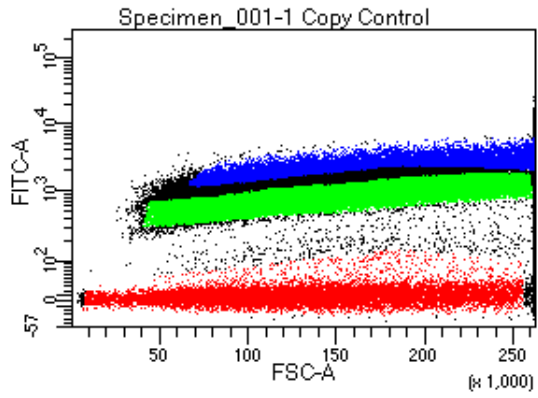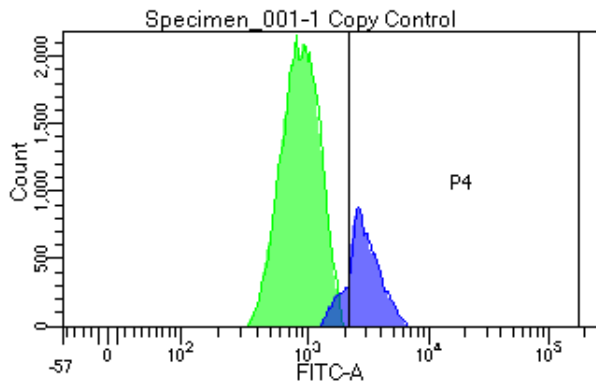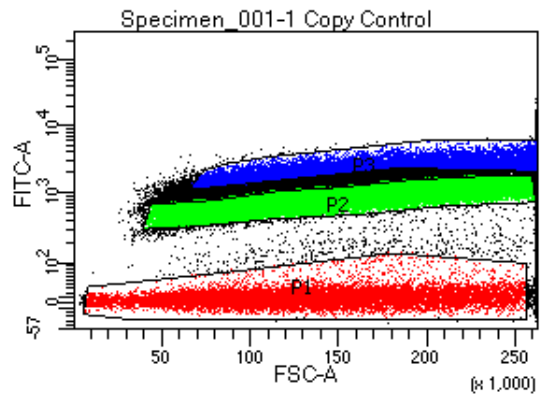

|                   |                         |                |
|-------------------|-------------------------|----------------|
| Experiment Name:  | Grace 2017-08-31        |                |
| Specimen Name:    | Specimen_001            |                |
| Tube Name:        | 1 Copy Control          |                |
| Record Date:      | Aug 31, 2017 1:49:35 PM |                |
| SOP:              | Administrator           |                |
| <b>Population</b> | <b>#Events</b>          | <b>%Parent</b> |
| ■ All Events      | 100,000                 | ####           |
| ■ P1              | 12,457                  | 12.5           |
| ■ P2              | 49,996                  | 50.0           |
| ■ P3              | 15,002                  | 15.0           |
| ☒ P4              | 12,832                  | 12.8           |

C)

BD FACSDiva 8.0.2

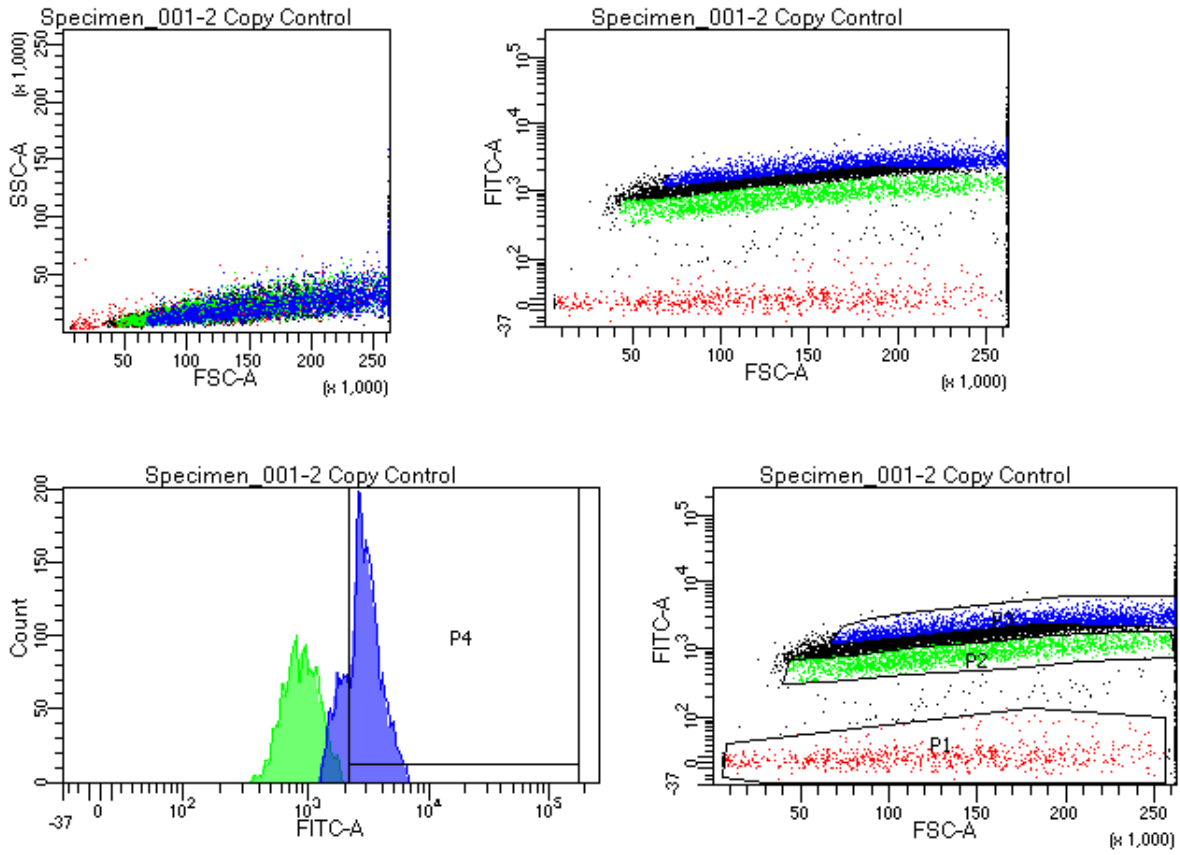

|                   |                         |                |
|-------------------|-------------------------|----------------|
| Experiment Name:  | Grace 2017-08-31        |                |
| Specimen Name:    | Specimen_001            |                |
| Tube Name:        | 2 Copy Control          |                |
| Record Date:      | Aug 31, 2017 1:52:52 PM |                |
| SOP:              | Administrator           |                |
| <b>Population</b> | <b>#Events</b>          | <b>%Parent</b> |
| ■ All Events      | 10,000                  | ####           |
| ■ P1              | 706                     | 7.1            |
| ■ P2              | 2,078                   | 20.8           |
| ■ P3              | 3,240                   | 32.4           |
| ☒ P4              | 2,712                   | 27.1           |

D)

BD FACSDiva 8.0.2

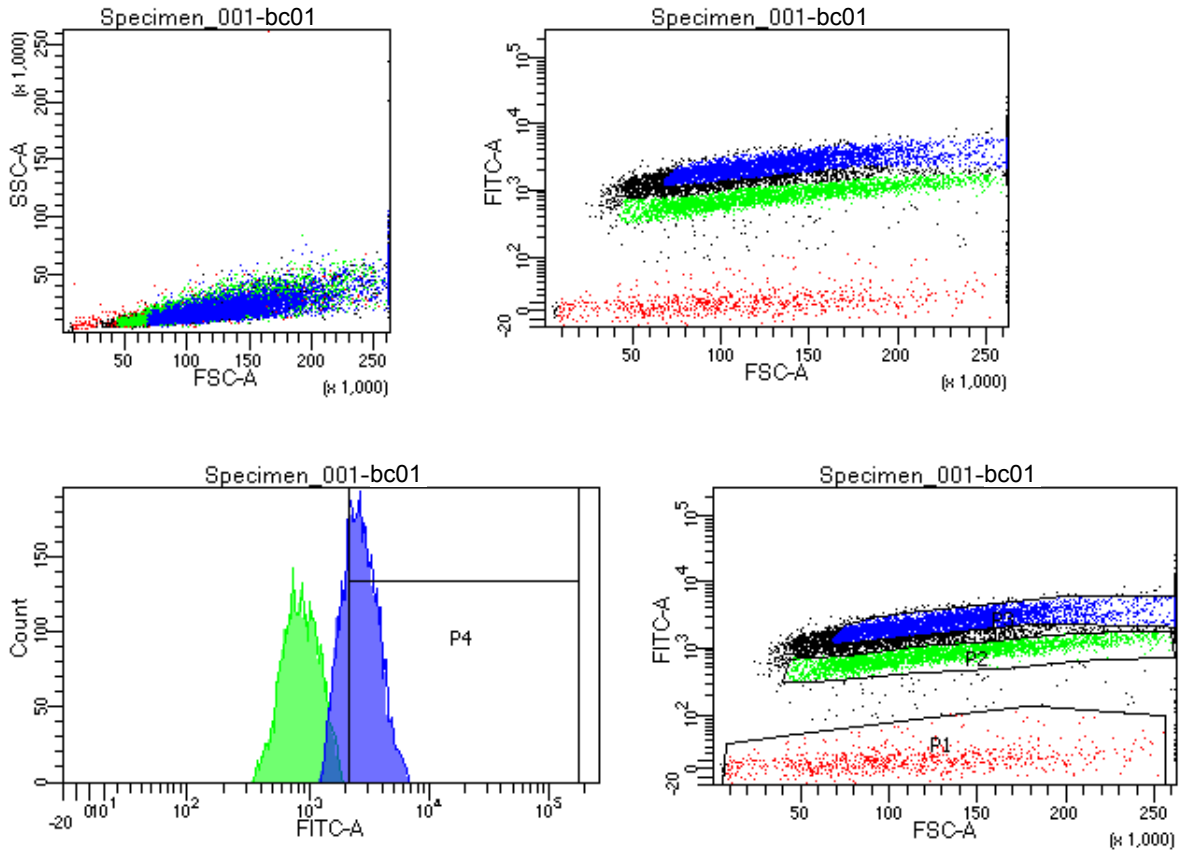

|                   |                         |                |
|-------------------|-------------------------|----------------|
| Experiment Name:  | Grace 2017-08-31        |                |
| Specimen Name:    | Specimen_001            |                |
| Tube Name:        | bc01                    |                |
| Record Date:      | Aug 31, 2017 2:03:27 PM |                |
| SOP:              | Administrator           |                |
| <b>Population</b> | <b>#Events</b>          | <b>%Parent</b> |
| All Events        | 10,000                  | ####           |
| P1                | 736                     | 7.4            |
| P2                | 2,930                   | 29.3           |
| P3                | 4,029                   | 40.3           |
| P4                | 2,783                   | 27.8           |

E)

BD FACSDiva 8.0.2

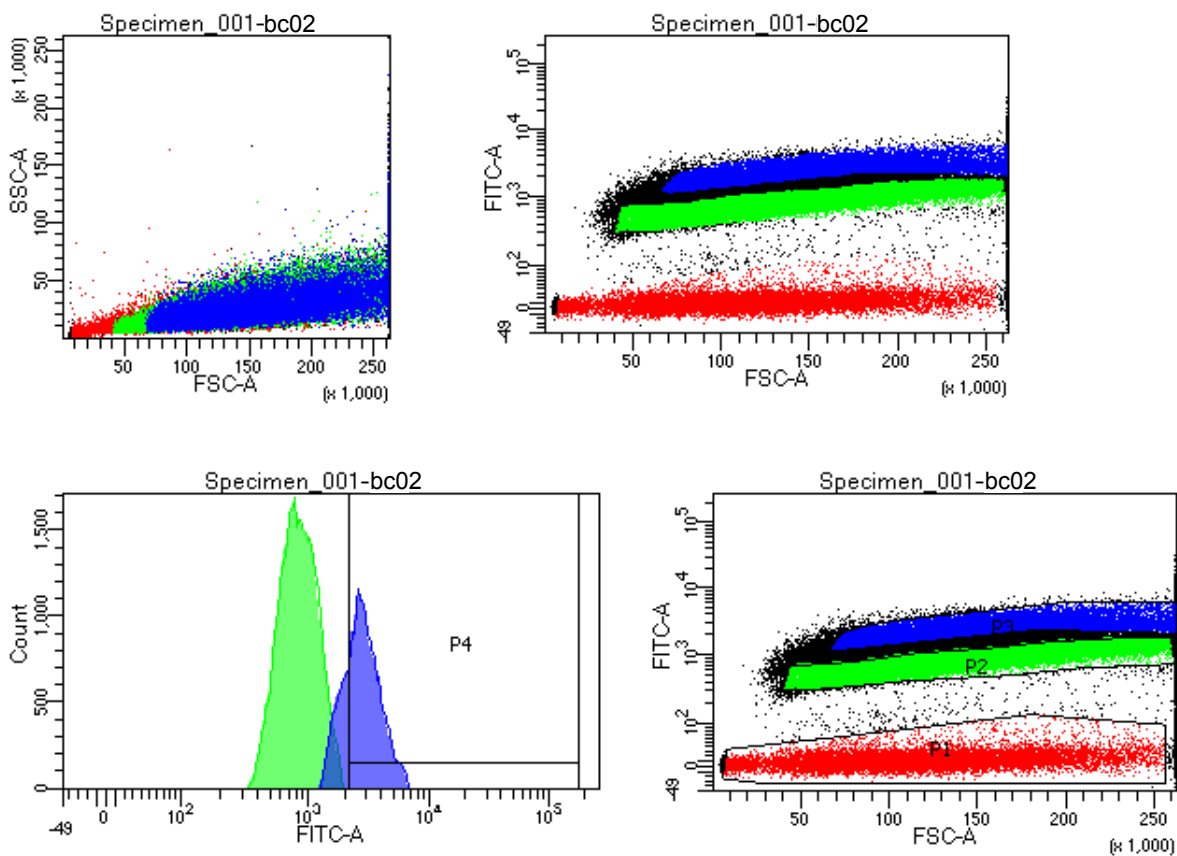

|                   |                         |                |
|-------------------|-------------------------|----------------|
| Experiment Name:  | Grace 2017-08-31        |                |
| Specimen Name:    | Specimen_001            |                |
| Tube Name:        | bc02                    |                |
| Record Date:      | Aug 31, 2017 2:53:46 PM |                |
| SOP:              | Administrator           |                |
| <b>Population</b> | <b>#Events</b>          | <b>%Parent</b> |
| ■ All Events      | 100,000                 | ####           |
| ■ P1              | 13,493                  | 13.5           |
| ■ P2              | 39,954                  | 40.0           |
| ■ P3              | 23,121                  | 23.1           |
| ☒ P4              | 17,966                  | 18.0           |

F)

BD FACSDiva 8.0.2

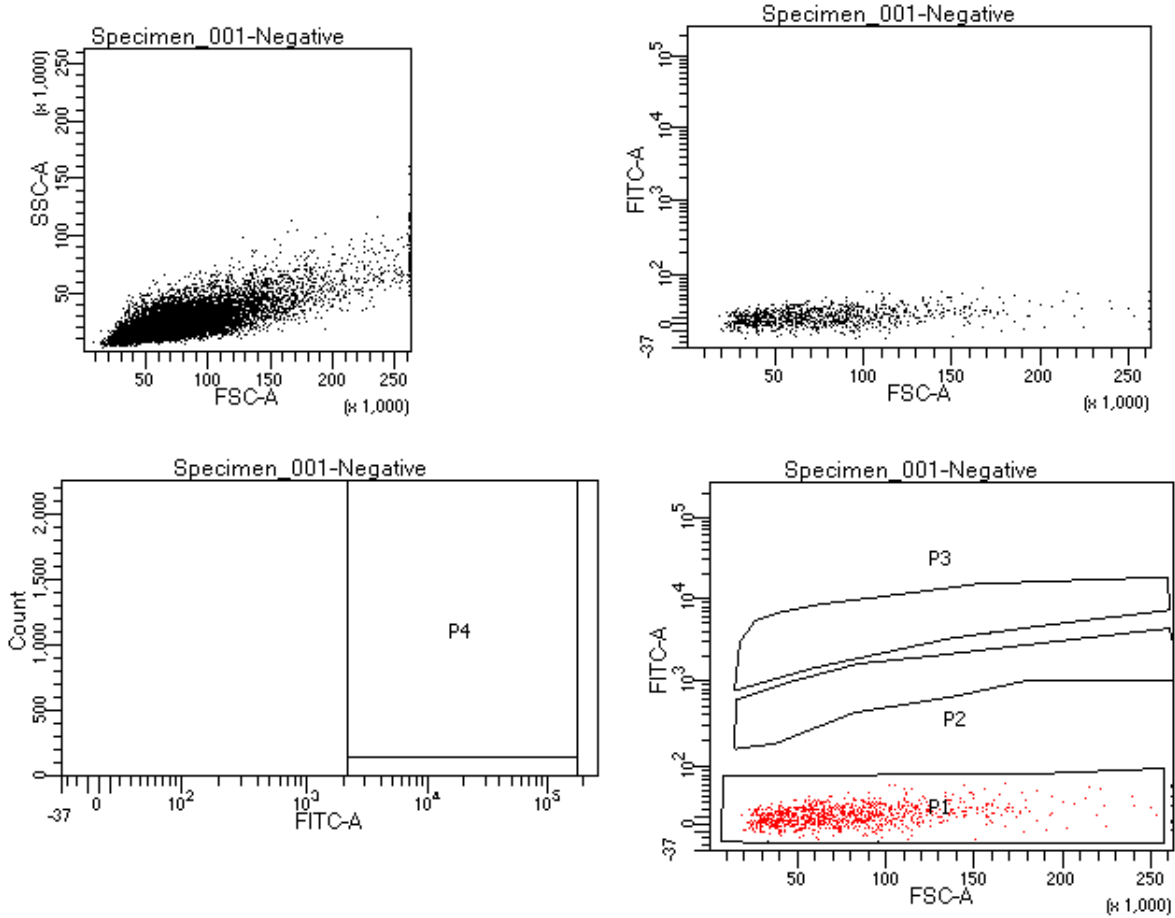

|                  |                        |
|------------------|------------------------|
| Experiment Name: | Grace 2017-09-05       |
| Specimen Name:   | Specimen_001           |
| Tube Name:       | Negative               |
| Record Date:     | Sep 5, 2017 3:29:40 PM |
| SOP:             | Administrator          |

  

| Population | #Events | %Parent |
|------------|---------|---------|
| All Events | 10,000  | ####    |
| P1         | 9,904   | 99.0    |
| P2         | 0       | 0.0     |
| P3         | 0       | 0.0     |
| P4         | 0       | 0.0     |

|                  |                                    |
|------------------|------------------------------------|
| Experiment Name: | Grace 2017-09-05                   |
| Specimen Name:   | Specimen_001                       |
| Tube Name:       | Negative                           |
| Record Date:     | Sep 5, 2017 3:29:40 PM             |
| SOP:             | Administrator                      |
| GUID:            | 256e4209-e736-4118-b0ce-dd4a7be... |

  

| Population | #Events | %Parent | FSC-A Mean | FSC-A Mean | FITC-A Mean | FITC-A Mean |
|------------|---------|---------|------------|------------|-------------|-------------|
| All Events | 10,000  | ####    | ####       | 78,585     | ####        | 10          |
| P1         | 9,904   | 99.0    | ####       | 77,219     | ####        | 10          |
| P2         | 0       | 0.0     | ####       | ####       | ####        | ####        |
| P3         | 0       | 0.0     | ####       | ####       | ####        | ####        |
| P4         | 0       | 0.0     | ####       | ####       | ####        | ####        |

G)

BD FACSDiva 8.0.2

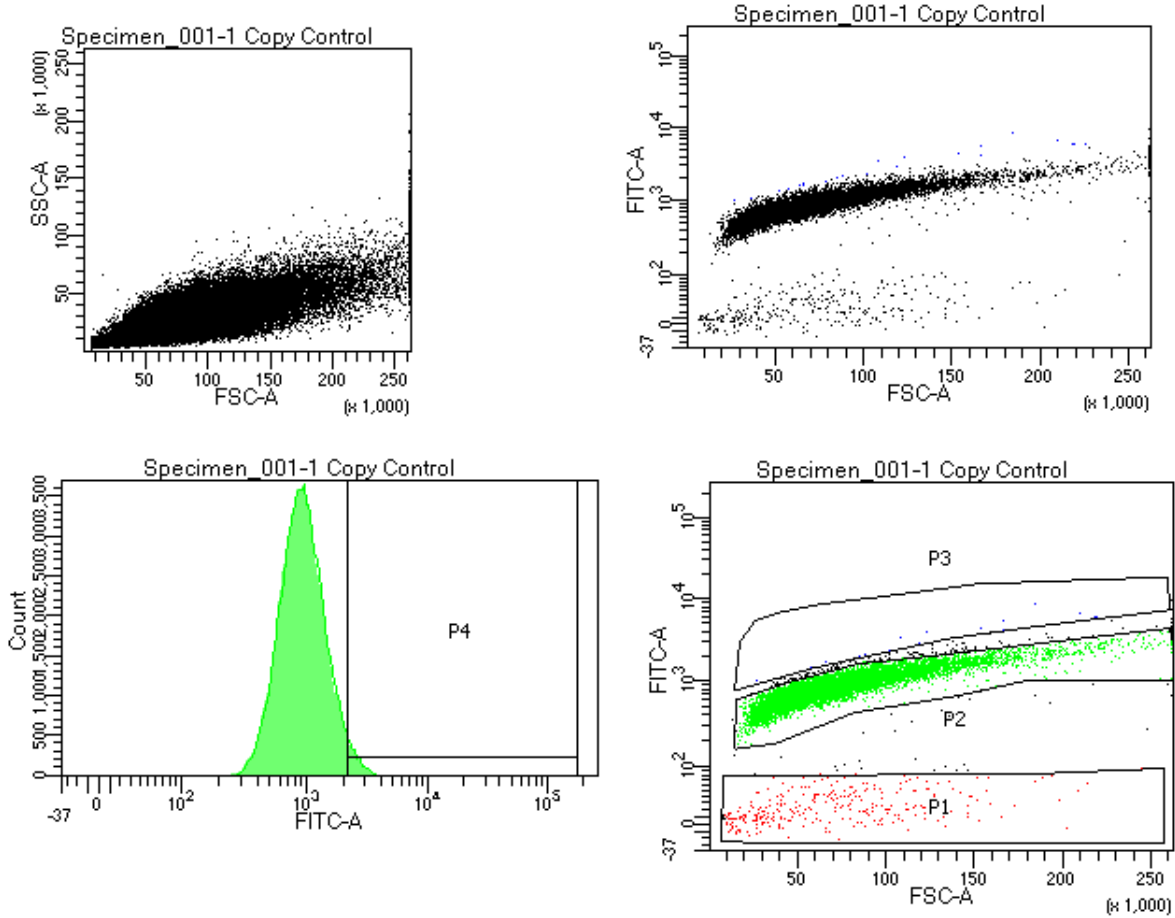

|                  |                        |  |
|------------------|------------------------|--|
| Experiment Name: | Grace 2017-09-05       |  |
| Specimen Name:   | Specimen_001           |  |
| Tube Name:       | 1 Copy Control         |  |
| Record Date:     | Sep 5, 2017 3:30:51 PM |  |
| SOP:             | Administrator          |  |

  

| Population | #Events | %Parent |
|------------|---------|---------|
| All Events | 100,000 | ####    |
| P1         | 2,775   | 2.8     |
| P2         | 94,945  | 94.9    |
| P3         | 151     | 0.2     |
| P4         | 3,168   | 3.2     |

|                  |                                      |  |  |
|------------------|--------------------------------------|--|--|
| Experiment Name: | Grace 2017-09-05                     |  |  |
| Specimen Name:   | Specimen_001                         |  |  |
| Tube Name:       | 1 Copy Control                       |  |  |
| Record Date:     | Sep 5, 2017 3:30:51 PM               |  |  |
| SOP:             | Administrator                        |  |  |
| GUID:            | b274fcbe-ceff-47ba-8267-f6477d7e9... |  |  |

  

| Population | #Events | %Parent | FSC-A Mean | FSC-A Mean | FITC-A Mean | FITC-A Mean |
|------------|---------|---------|------------|------------|-------------|-------------|
| All Events | 100,000 | ####    | ####       | 76,785     | ####        | 939         |
| P1         | 2,775   | 2.8     | ####       | 69,014     | ####        | 23          |
| P2         | 94,945  | 94.9    | ####       | 76,019     | ####        | 941         |
| P3         | 151     | 0.2     | ####       | 91,456     | ####        | 2,592       |
| P4         | 3,168   | 3.2     | ####       | 200,230    | ####        | 2,786       |

H)

BD FACSDiva 8.0.2

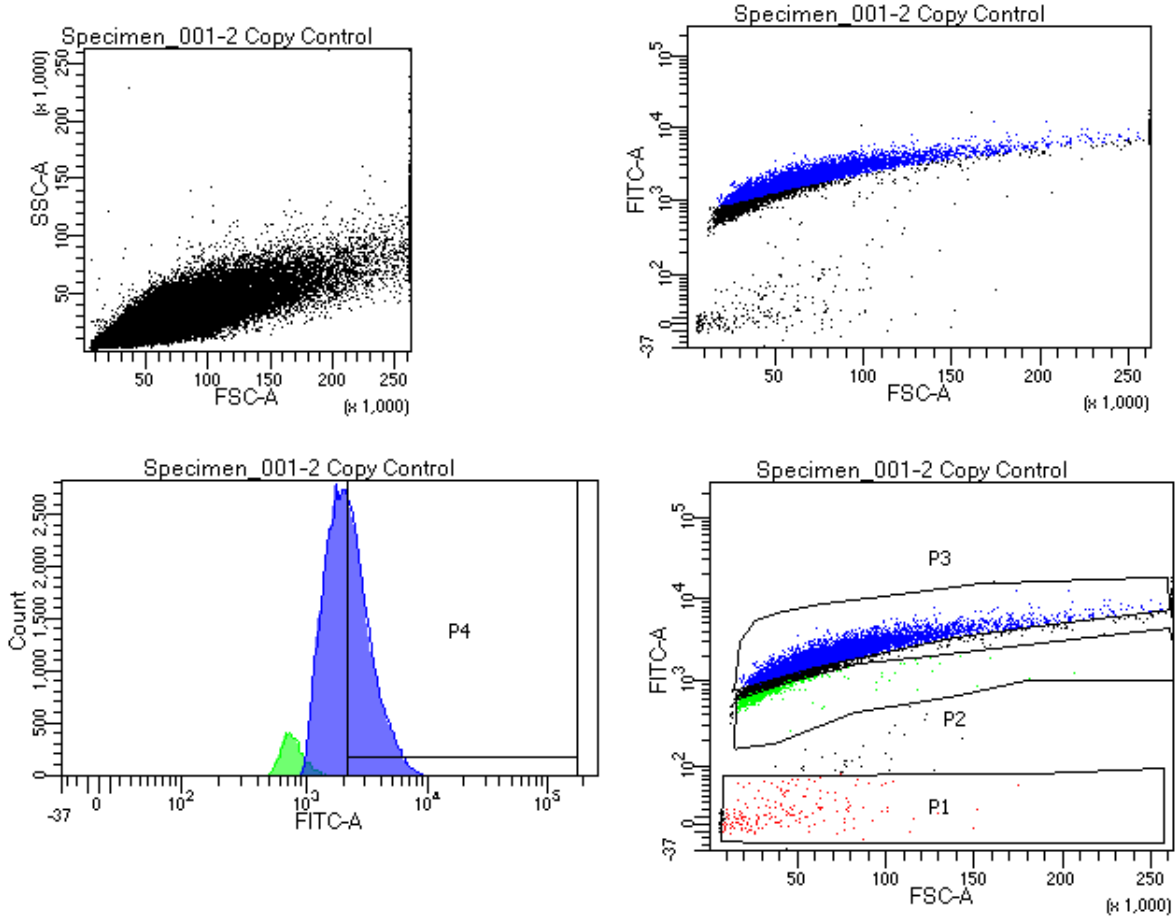

|                  |                        |  |
|------------------|------------------------|--|
| Experiment Name: | Grace 2017-09-05       |  |
| Specimen Name:   | Specimen_001           |  |
| Tube Name:       | 2 Copy Control         |  |
| Record Date:     | Sep 5, 2017 3:38:04 PM |  |
| SOP:             | Administrator          |  |

  

| Population | #Events | %Parent |
|------------|---------|---------|
| All Events | 100,000 | ####    |
| P1         | 1,999   | 2.0     |
| P2         | 5,700   | 5.7     |
| P3         | 71,741  | 71.7    |
| P4         | 31,337  | 31.3    |

|                  |                                     |  |  |
|------------------|-------------------------------------|--|--|
| Experiment Name: | Grace 2017-09-05                    |  |  |
| Specimen Name:   | Specimen_001                        |  |  |
| Tube Name:       | 2 Copy Control                      |  |  |
| Record Date:     | Sep 5, 2017 3:38:04 PM              |  |  |
| SOP:             | Administrator                       |  |  |
| GUID:            | 1cbf163f-bd8c-4e2d-970b-b6298de5... |  |  |

  

| Population | #Events | %Parent | FSC-A Mean | FSC-A Mean | FITC-A Mean | FITC-A Mean |
|------------|---------|---------|------------|------------|-------------|-------------|
| All Events | 100,000 | ####    | ####       | 62,888     | ####        | 1,898       |
| P1         | 1,999   | 2.0     | ####       | 42,321     | ####        | 17          |
| P2         | 5,700   | 5.7     | ####       | 35,625     | ####        | 772         |
| P3         | 71,741  | 71.7    | ####       | 69,153     | ####        | 2,203       |
| P4         | 31,337  | 31.3    | ####       | 100,767    | ####        | 3,237       |



I)

BD FACSDiva 8.0.2

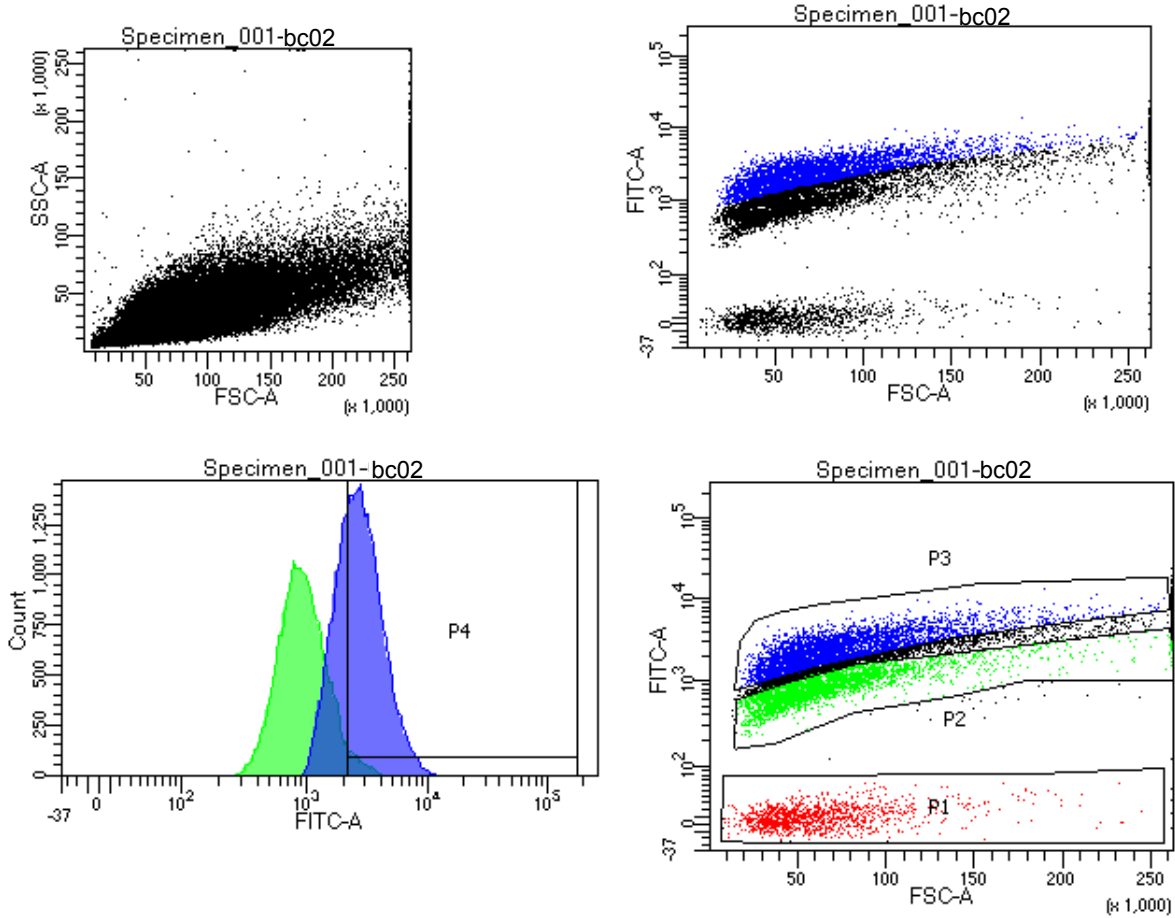

|                  |                        |
|------------------|------------------------|
| Experiment Name: | Grace 2017-09-05       |
| Specimen Name:   | Specimen_001           |
| Tube Name:       | bc02                   |
| Record Date:     | Sep 5, 2017 3:52:47 PM |
| SOP:             | Administrator          |

  

| Population | #Events | %Parent |
|------------|---------|---------|
| All Events | 100,000 | ####    |
| P1         | 11,939  | 11.9    |
| P2         | 29,369  | 29.4    |
| P3         | 40,376  | 40.4    |
| P4         | 33,529  | 33.5    |

|                  |                                     |
|------------------|-------------------------------------|
| Experiment Name: | Grace 2017-09-05                    |
| Specimen Name:   | Specimen_001                        |
| Tube Name:       | bc02                                |
| Record Date:     | Sep 5, 2017 3:52:47 PM              |
| SOP:             | Administrator                       |
| GUID:            | fb18162a-14d9-413c-938e-4cb18e20... |

  

| Population | #Events | %Parent | FSC-A Mean | FSC-A Mean | FITC-A Mean | FITC-A Mean |
|------------|---------|---------|------------|------------|-------------|-------------|
| All Events | 100,000 | ####    | ####       | 77,734     | ####        | 1,826       |
| P1         | 11,939  | 11.9    | ####       | 63,252     | ####        | 9           |
| P2         | 29,369  | 29.4    | ####       | 69,755     | ####        | 957         |
| P3         | 40,376  | 40.4    | ####       | 75,440     | ####        | 2,752       |
| P4         | 33,529  | 33.5    | ####       | 111,981    | ####        | 3,523       |

J)

BD FACSDiva 8.0.2

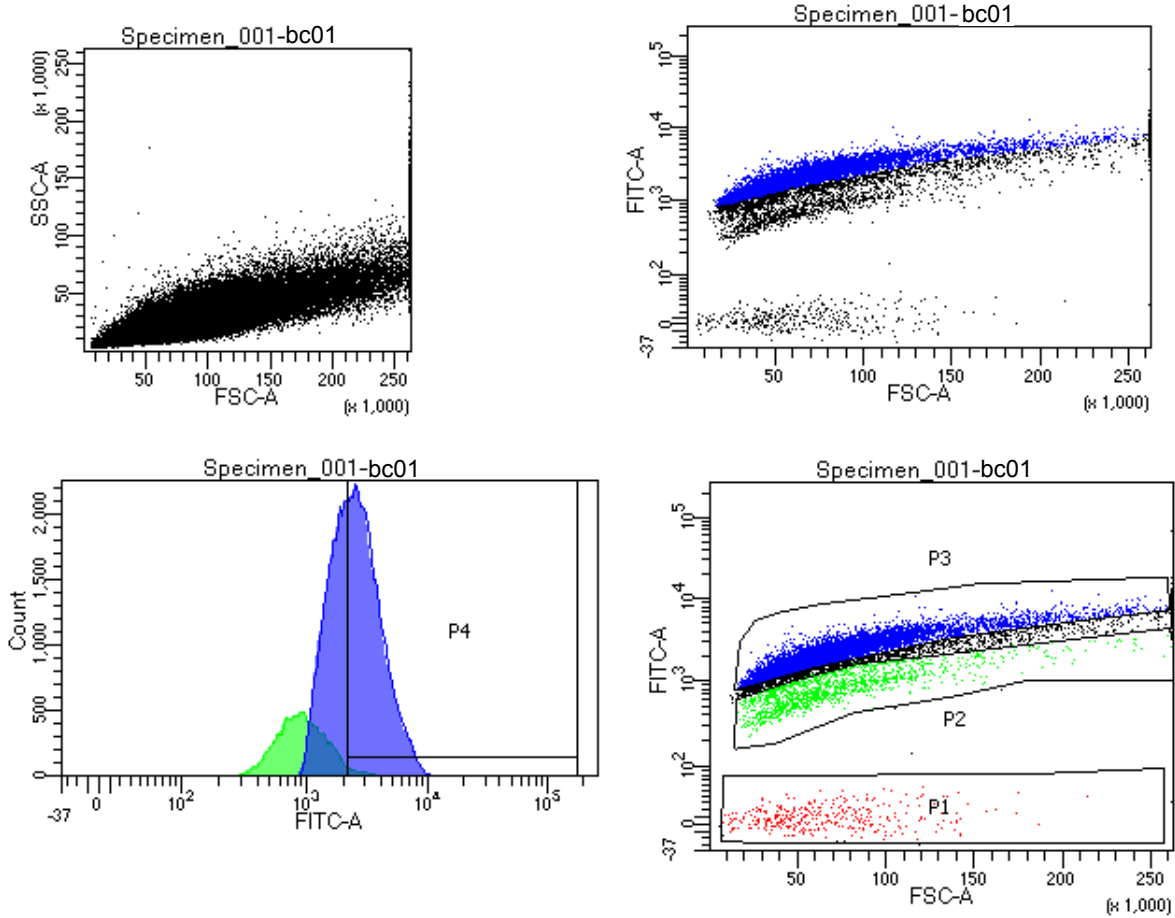

|                  |                        |
|------------------|------------------------|
| Experiment Name: | Grace 2017-09-05       |
| Specimen Name:   | Specimen_001           |
| Tube Name:       | bc01                   |
| Record Date:     | Sep 5, 2017 4:03:00 PM |
| SOP:             | Administrator          |

  

| Population | #Events | %Parent |
|------------|---------|---------|
| All Events | 100,000 | ####    |
| P1         | 3,338   | 3.3     |
| P2         | 14,717  | 14.7    |
| P3         | 68,047  | 68.0    |
| P4         | 44,843  | 44.8    |

|                  |                                     |
|------------------|-------------------------------------|
| Experiment Name: | Grace 2017-09-05                    |
| Specimen Name:   | Specimen_001                        |
| Tube Name:       | bc01                                |
| Record Date:     | Sep 5, 2017 4:03:00 PM              |
| SOP:             | Administrator                       |
| GUID:            | 7ad9a62f-e86f-45a4-b39b-da13c3d9... |

  

| Population | #Events | %Parent | FSC-A Mean | FSC-A Mean | FITC-A Mean | FITC-A Mean |
|------------|---------|---------|------------|------------|-------------|-------------|
| All Events | 100,000 | ####    | ####       | 81,365     | ####        | 2,298       |
| P1         | 3,338   | 3.3     | ####       | 63,898     | ####        | 8           |
| P2         | 14,717  | 14.7    | ####       | 72,601     | ####        | 965         |
| P3         | 68,047  | 68.0    | ####       | 76,605     | ####        | 2,580       |
| P4         | 44,843  | 44.8    | ####       | 115,623    | ####        | 3,584       |

K)

BD FACSDiva 8.0.2

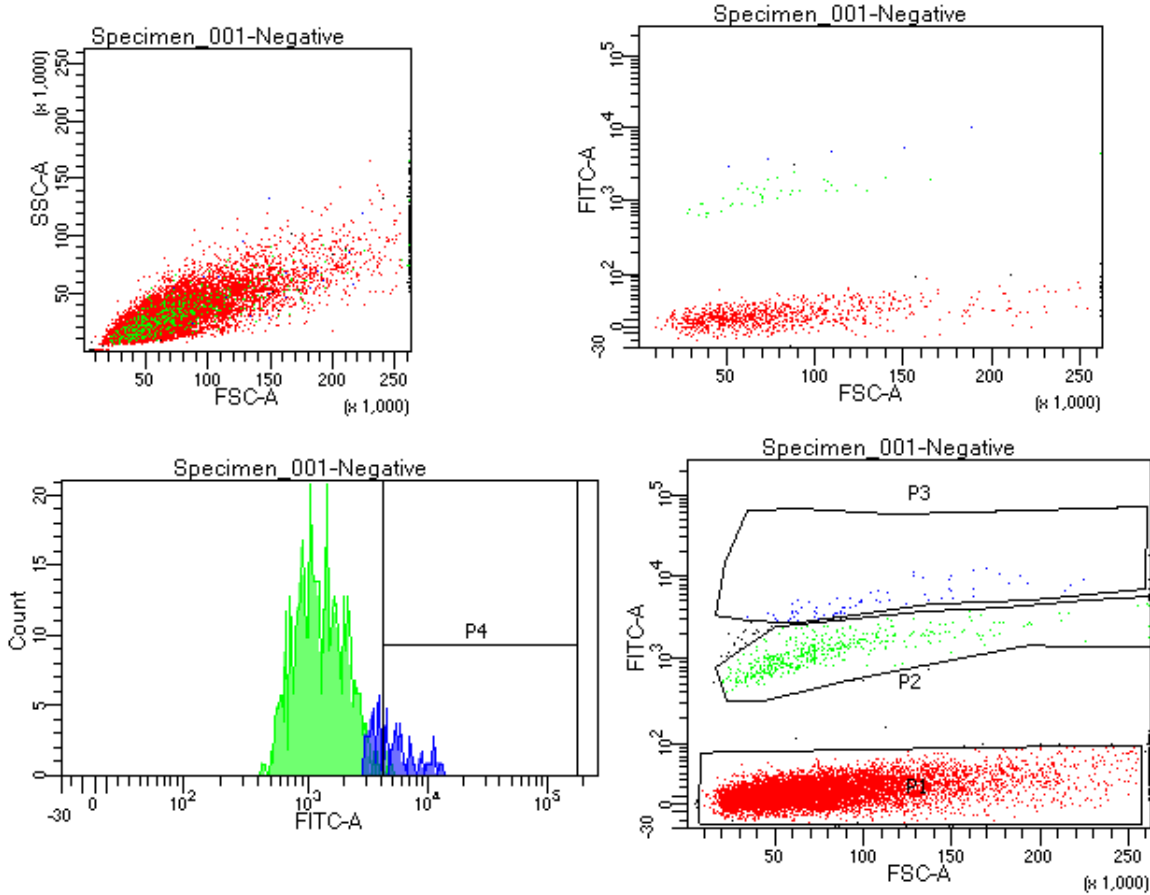

|                  |                          |  |
|------------------|--------------------------|--|
| Experiment Name: | Grace 2017-09-05_001     |  |
| Specimen Name:   | Specimen_001             |  |
| Tube Name:       | Negative                 |  |
| Record Date:     | Sep 19, 2017 12:46:27 PM |  |
| SOP:             | Administrator            |  |

  

| Population | #Events | %Parent |
|------------|---------|---------|
| All Events | 10,000  | ####    |
| P1         | 9,308   | 93.1    |
| P2         | 449     | 4.5     |
| P3         | 75      | 0.8     |
| P4         | 52      | 0.5     |

|                  |                                    |  |
|------------------|------------------------------------|--|
| Experiment Name: | Grace 2017-09-05_001               |  |
| Specimen Name:   | Specimen_001                       |  |
| Tube Name:       | Negative                           |  |
| Record Date:     | Sep 19, 2017 12:46:27 PM           |  |
| SOP:             | Administrator                      |  |
| GUID:            | 65ddcd06-d65c-428b-b71a-5d0aedc... |  |

  

| Population | #Events | %Parent | FSC-A Mean | FITC-A Mean |
|------------|---------|---------|------------|-------------|
| All Events | 10,000  | ####    | 77,217     | 124         |
| P1         | 9,308   | 93.1    | 74,907     | 14          |
| P2         | 449     | 4.5     | 76,959     | 1,335       |
| P3         | 75      | 0.8     | 101,918    | 5,289       |
| P4         | 52      | 0.5     | 148,122    | 6,800       |

L)

BD FACSDiva 8.0.2

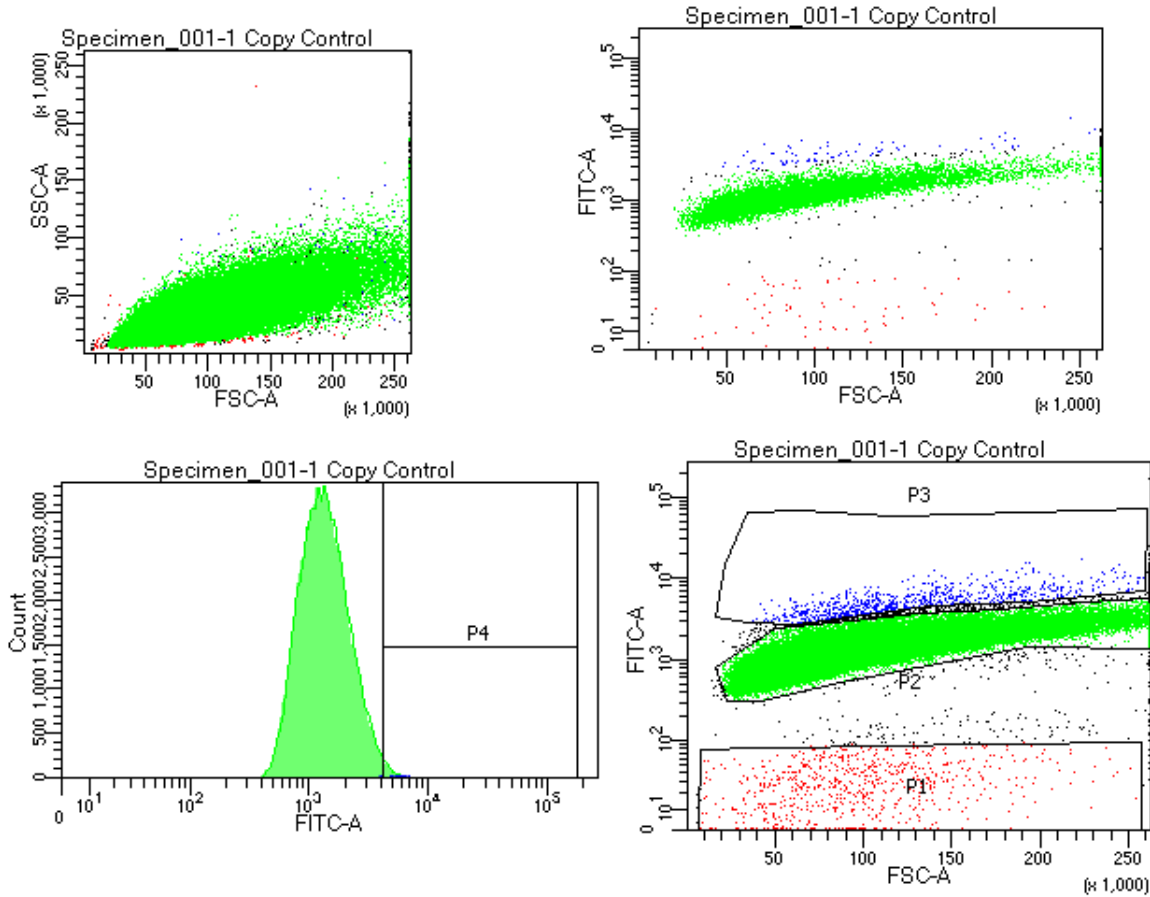

|                  |                          |  |
|------------------|--------------------------|--|
| Experiment Name: | Grace 2017-09-05_001     |  |
| Specimen Name:   | Specimen_001             |  |
| Tube Name:       | 1 Copy Control           |  |
| Record Date:     | Sep 19, 2017 12:48:24 PM |  |
| SOP:             | Administrator            |  |

  

| Population | #Events | %Parent |
|------------|---------|---------|
| All Events | 100,000 | ####    |
| P1         | 701     | 0.7     |
| P2         | 97,576  | 97.6    |
| P3         | 799     | 0.8     |
| P4         | 1,745   | 1.7     |

|                  |                                      |  |  |  |
|------------------|--------------------------------------|--|--|--|
| Experiment Name: | Grace 2017-09-05_001                 |  |  |  |
| Specimen Name:   | Specimen_001                         |  |  |  |
| Tube Name:       | 1 Copy Control                       |  |  |  |
| Record Date:     | Sep 19, 2017 12:48:24 PM             |  |  |  |
| SOP:             | Administrator                        |  |  |  |
| GUID:            | 18653049-a86c-4f23-bf7a-6a6a6b5fa... |  |  |  |

  

| Population | #Events | %Parent | FSC-A Mean | FITC-A Mean |
|------------|---------|---------|------------|-------------|
| All Events | 100,000 | ####    | 101,053    | 1,454       |
| P1         | 701     | 0.7     | 96,666     | 30          |
| P2         | 97,576  | 97.6    | 100,216    | 1,407       |
| P3         | 799     | 0.8     | 127,481    | 5,567       |
| P4         | 1,745   | 1.7     | 212,920    | 5,801       |

M)

BD FACSDiva 8.0.2

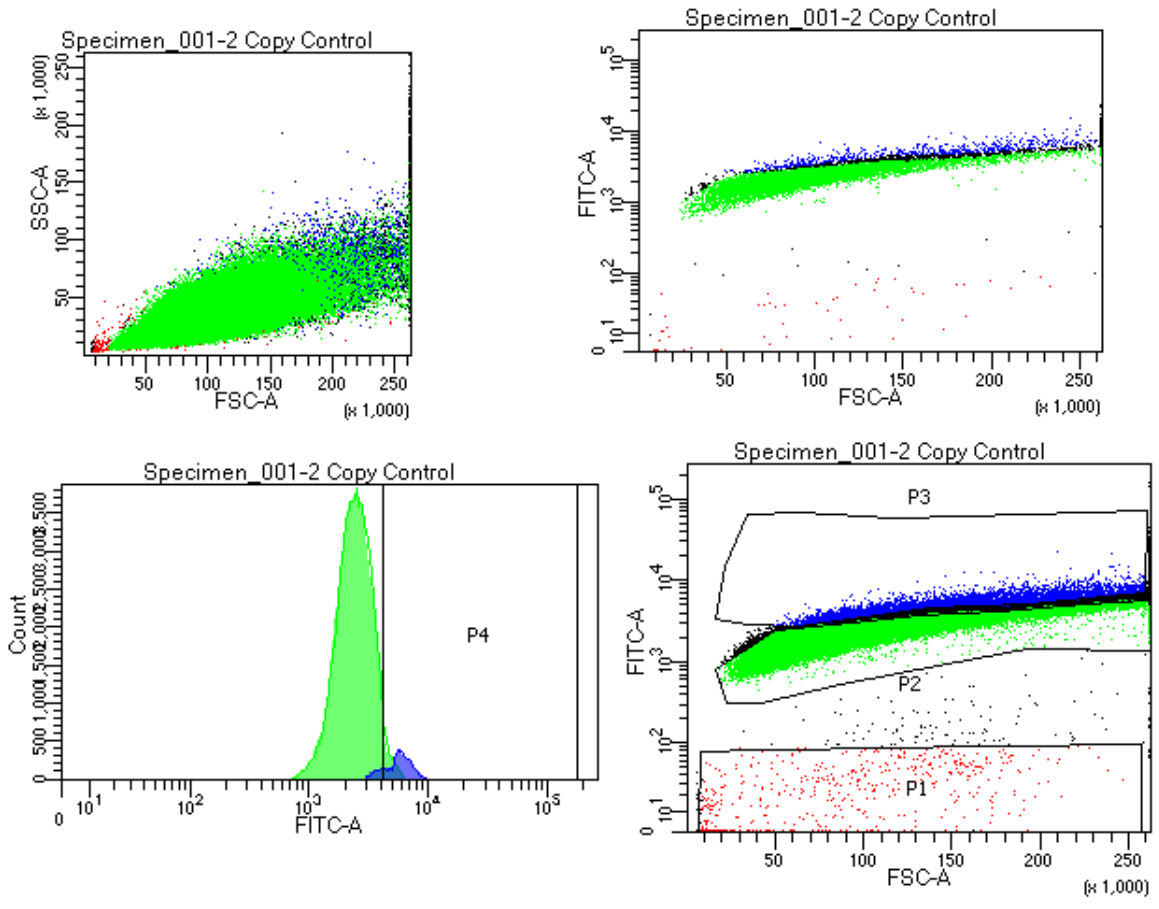

Experiment Name: Grace 2017-09-05\_001  
 Specimen Name: Specimen\_001  
 Tube Name: 2 Copy Control  
 Record Date: Sep 19, 2017 12:50:08 PM  
 SOP: Administrator

| Population | #Events | %Parent |
|------------|---------|---------|
| All Events | 100,000 | ####    |
| P1         | 485     | 0.5     |
| P2         | 81,860  | 81.9    |
| P3         | 5,765   | 5.8     |
| P4         | 14,351  | 14.4    |

Experiment Name: Grace 2017-09-05\_001  
 Specimen Name: Specimen\_001  
 Tube Name: 2 Copy Control  
 Record Date: Sep 19, 2017 12:50:08 PM  
 SOP: Administrator  
 GUID: b08136f7-74ad-4b4d-815c-df9b6ef41...

| Population | #Events | %Parent | FSC-A Mean | FITC-A Mean |
|------------|---------|---------|------------|-------------|
| All Events | 100,000 | ####    | 111,527    | 2,861       |
| P1         | 485     | 0.5     | 90,507     | 29          |
| P2         | 81,860  | 81.9    | 99,271     | 2,364       |
| P3         | 5,765   | 5.8     | 157,567    | 5,425       |
| P4         | 14,351  | 14.4    | 202,182    | 5,894       |

N)

BD FACSDiva 8.0.2

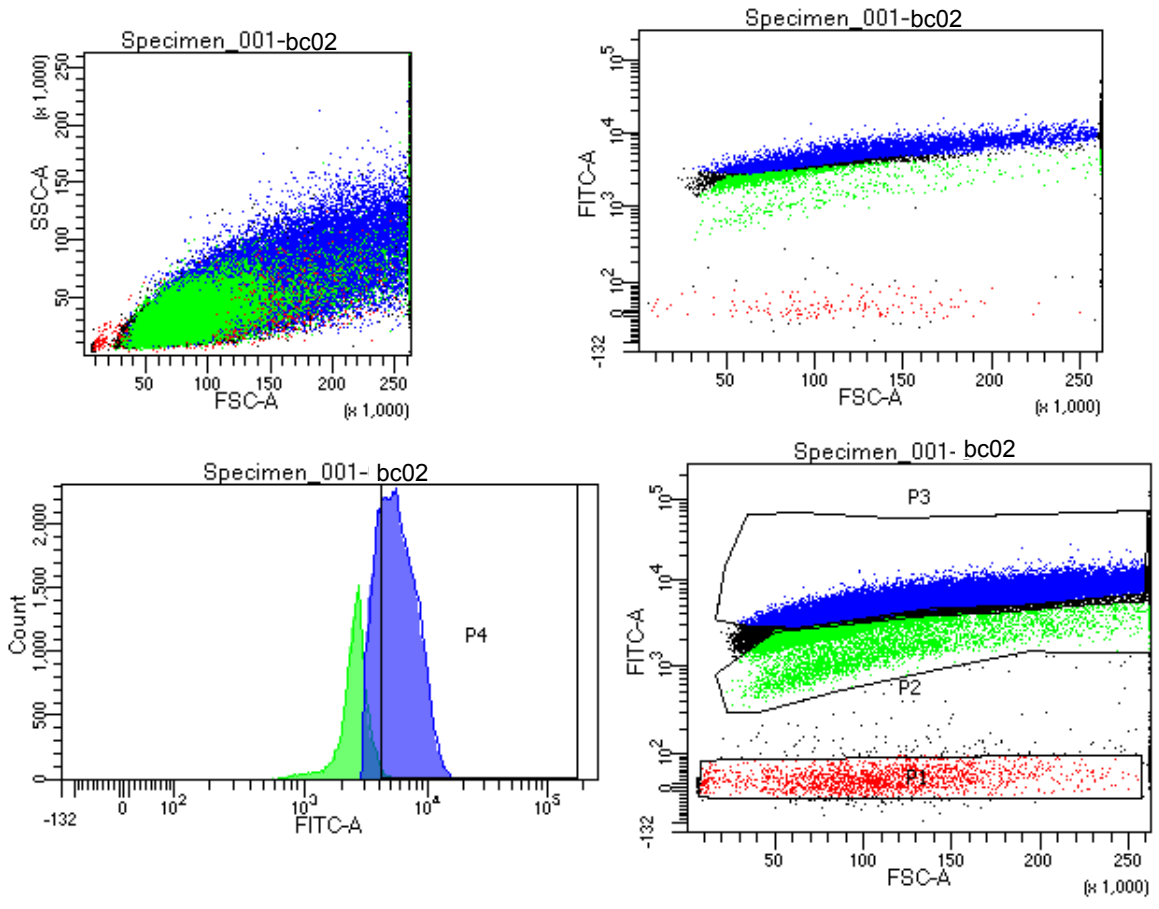

|                  |                         |  |
|------------------|-------------------------|--|
| Experiment Name: | Grace 2017-09-05_001    |  |
| Specimen Name:   | Specimen_001            |  |
| Tube Name:       | bc02                    |  |
| Record Date:     | Sep 19, 2017 1:03:24 PM |  |
| SOP:             | Administrator           |  |

  

| Population                             | #Events | %Parent |
|----------------------------------------|---------|---------|
| All Events                             | 100,000 | ####    |
| P1                                     | 1,626   | 1.6     |
| P2                                     | 17,839  | 17.8    |
| P3                                     | 57,182  | 57.2    |
| <input checked="" type="checkbox"/> P4 | 51,708  | 51.7    |

|                  |                                     |  |
|------------------|-------------------------------------|--|
| Experiment Name: | Grace 2017-09-05_001                |  |
| Specimen Name:   | Specimen_001                        |  |
| Tube Name:       | bc02                                |  |
| Record Date:     | Sep 19, 2017 1:03:24 PM             |  |
| SOP:             | Administrator                       |  |
| GUID:            | 0ebca134-bb28-4452-a588-0e834f4d... |  |

  

| Population                             | #Events | %Parent | FSC-A Mean | FITC-A Mean |
|----------------------------------------|---------|---------|------------|-------------|
| All Events                             | 100,000 | ####    | 128,149    | 5,254       |
| P1                                     | 1,626   | 1.6     | 108,927    | 25          |
| P2                                     | 17,839  | 17.8    | 83,969     | 2,383       |
| P3                                     | 57,182  | 57.2    | 130,960    | 5,571       |
| <input checked="" type="checkbox"/> P4 | 51,708  | 51.7    | 170,826    | 7,512       |

O)

BD FACSDiva 8.0.2

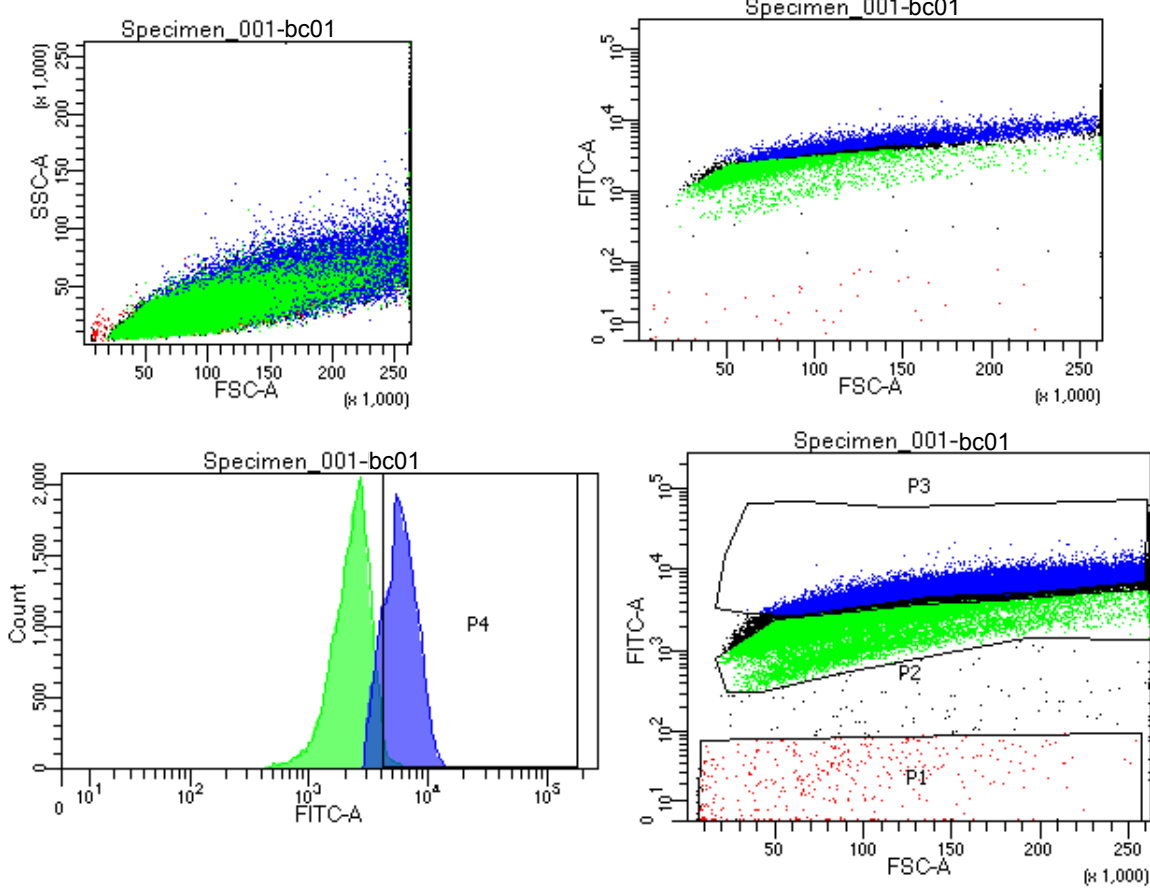

|                  |                         |  |
|------------------|-------------------------|--|
| Experiment Name: | Grace 2017-09-05_001    |  |
| Specimen Name:   | Specimen_001            |  |
| Tube Name:       | bc01                    |  |
| Record Date:     | Sep 19, 2017 1:13:11 PM |  |
| SOP:             | Administrator           |  |

  

| Population | #Events | %Parent |
|------------|---------|---------|
| All Events | 100,000 | ####    |
| P1         | 382     | 0.4     |
| P2         | 40,088  | 40.1    |
| P3         | 37,055  | 37.1    |
| P4         | 42,072  | 42.1    |

|                  |                                     |  |
|------------------|-------------------------------------|--|
| Experiment Name: | Grace 2017-09-05_001                |  |
| Specimen Name:   | Specimen_001                        |  |
| Tube Name:       | bc01                                |  |
| Record Date:     | Sep 19, 2017 1:13:11 PM             |  |
| SOP:             | Administrator                       |  |
| GUID:            | 7c4f41a3-3ac3-43a5-869b-76149b9c... |  |

  

| Population | #Events | %Parent | FSC-A Mean | FITC-A Mean |
|------------|---------|---------|------------|-------------|
| All Events | 100,000 | ####    | 126,459    | 4,448       |
| P1         | 382     | 0.4     | 87,626     | 31          |
| P2         | 40,088  | 40.1    | 85,821     | 2,223       |
| P3         | 37,055  | 37.1    | 147,748    | 5,731       |
| P4         | 42,072  | 42.1    | 181,620    | 7,074       |

P)

BD FACSDiva 8.0.2

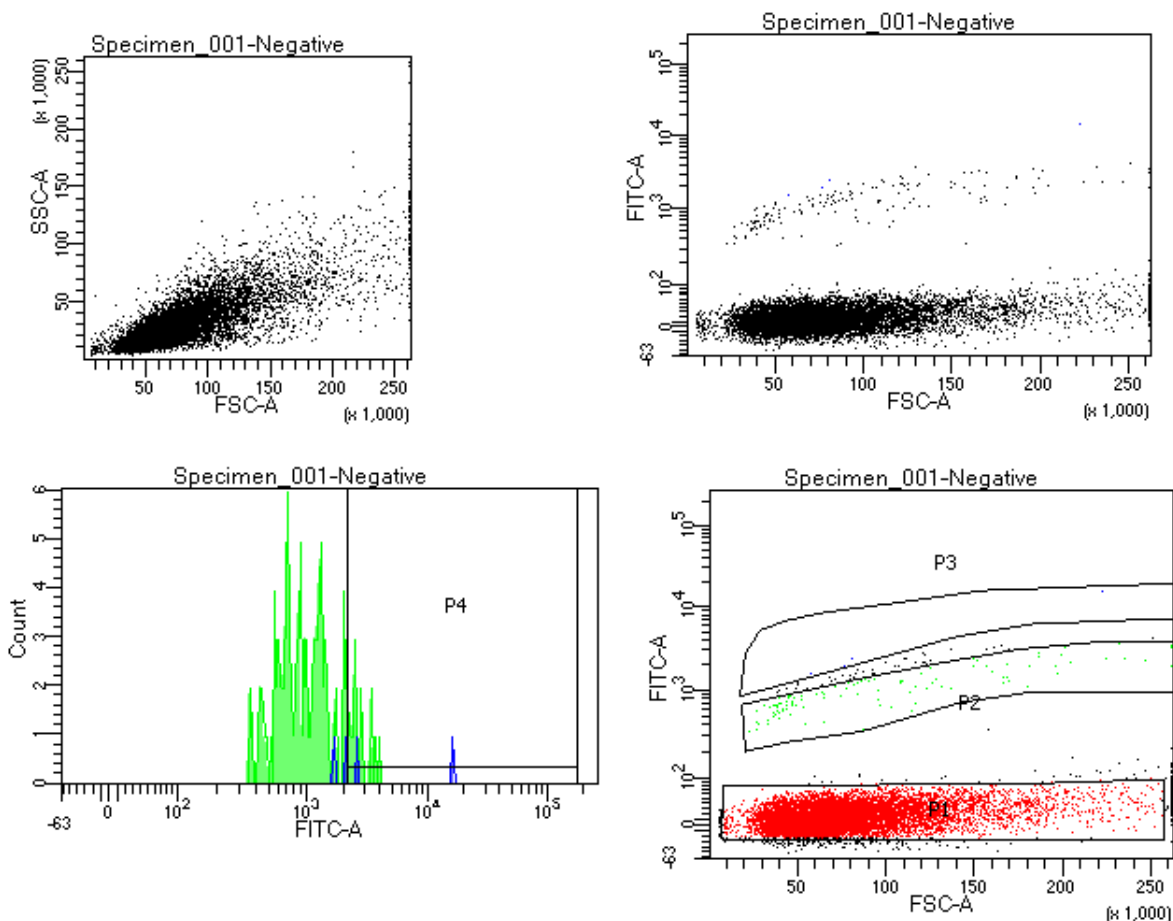

|                  |                          |  |
|------------------|--------------------------|--|
| Experiment Name: | Grace 2017-10-17         |  |
| Specimen Name:   | Specimen_001             |  |
| Tube Name:       | Negative                 |  |
| Record Date:     | Oct 17, 2017 12:35:19 PM |  |
| SOP:             | Administrator            |  |

  

| Population | #Events | %Parent |
|------------|---------|---------|
| All Events | 10,000  | ####    |
| P1         | 9,429   | 94.3    |
| P2         | 108     | 1.1     |
| P3         | 4       | 0.0     |
| P4         | 32      | 0.3     |

|                  |                                     |  |
|------------------|-------------------------------------|--|
| Experiment Name: | Grace 2017-10-17                    |  |
| Specimen Name:   | Specimen_001                        |  |
| Tube Name:       | Negative                            |  |
| Record Date:     | Oct 17, 2017 12:35:19 PM            |  |
| SOP:             | Administrator                       |  |
| GUID:            | 5eedb4d7-bbf7-40d3-8c37-1c40777a... |  |

  

| Population | #Events | %Parent | FSC-A Mean | FITC-A Mean |
|------------|---------|---------|------------|-------------|
| All Events | 10,000  | ####    | 80,455     | 38          |
| P1         | 9,429   | 94.3    | 78,843     | 15          |
| P2         | 108     | 1.1     | 97,041     | 1,157       |
| P3         | 4       | 0.0     | 108,869    | 5,317       |
| P4         | 32      | 0.3     | 167,384    | 3,155       |



Q)

BD FACSDiva 8.0.2

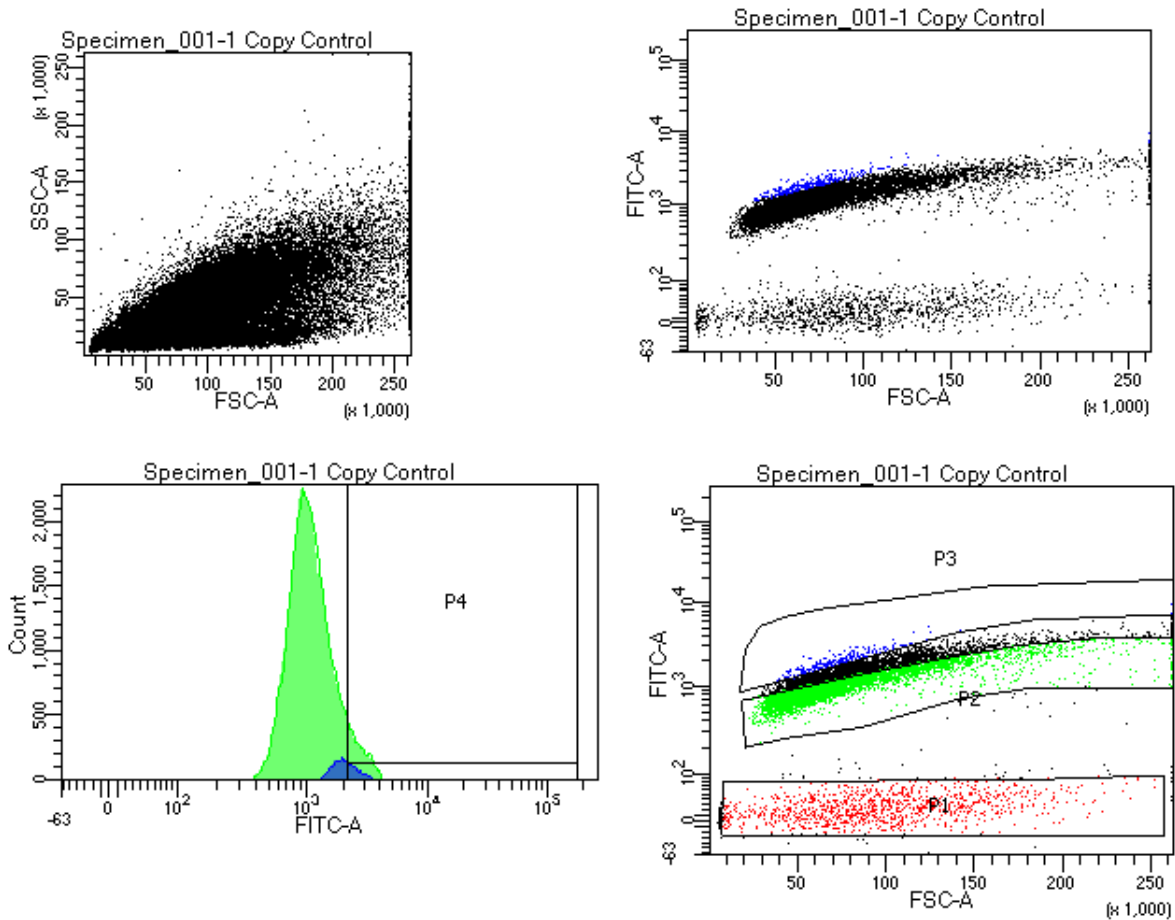

|                  |                          |  |
|------------------|--------------------------|--|
| Experiment Name: | Grace 2017-10-17         |  |
| Specimen Name:   | Specimen_001             |  |
| Tube Name:       | 1 Copy Control           |  |
| Record Date:     | Oct 17, 2017 12:36:45 PM |  |
| SOP:             | Administrator            |  |

  

| Population | #Events | %Parent |
|------------|---------|---------|
| All Events | 100,000 | ####    |
| P1         | 10,287  | 10.3    |
| P2         | 53,066  | 53.1    |
| P3         | 2,669   | 2.7     |
| P4         | 11,478  | 11.5    |

|                  |                                     |  |
|------------------|-------------------------------------|--|
| Experiment Name: | Grace 2017-10-17                    |  |
| Specimen Name:   | Specimen_001                        |  |
| Tube Name:       | 1 Copy Control                      |  |
| Record Date:     | Oct 17, 2017 12:36:45 PM            |  |
| SOP:             | Administrator                       |  |
| GUID:            | 1c58b535-c384-4236-8a22-a3b3f0ea... |  |

  

| Population | #Events | %Parent | FSC-A Mean | FITC-A Mean |
|------------|---------|---------|------------|-------------|
| All Events | 100,000 | ####    | 85,056     | 1,234       |
| P1         | 10,287  | 10.3    | 95,216     | 23          |
| P2         | 53,066  | 53.1    | 80,010     | 1,128       |
| P3         | 2,669   | 2.7     | 73,831     | 2,118       |
| P4         | 11,478  | 11.5    | 151,552    | 2,823       |

R)

BD FACSDiva 8.0.2

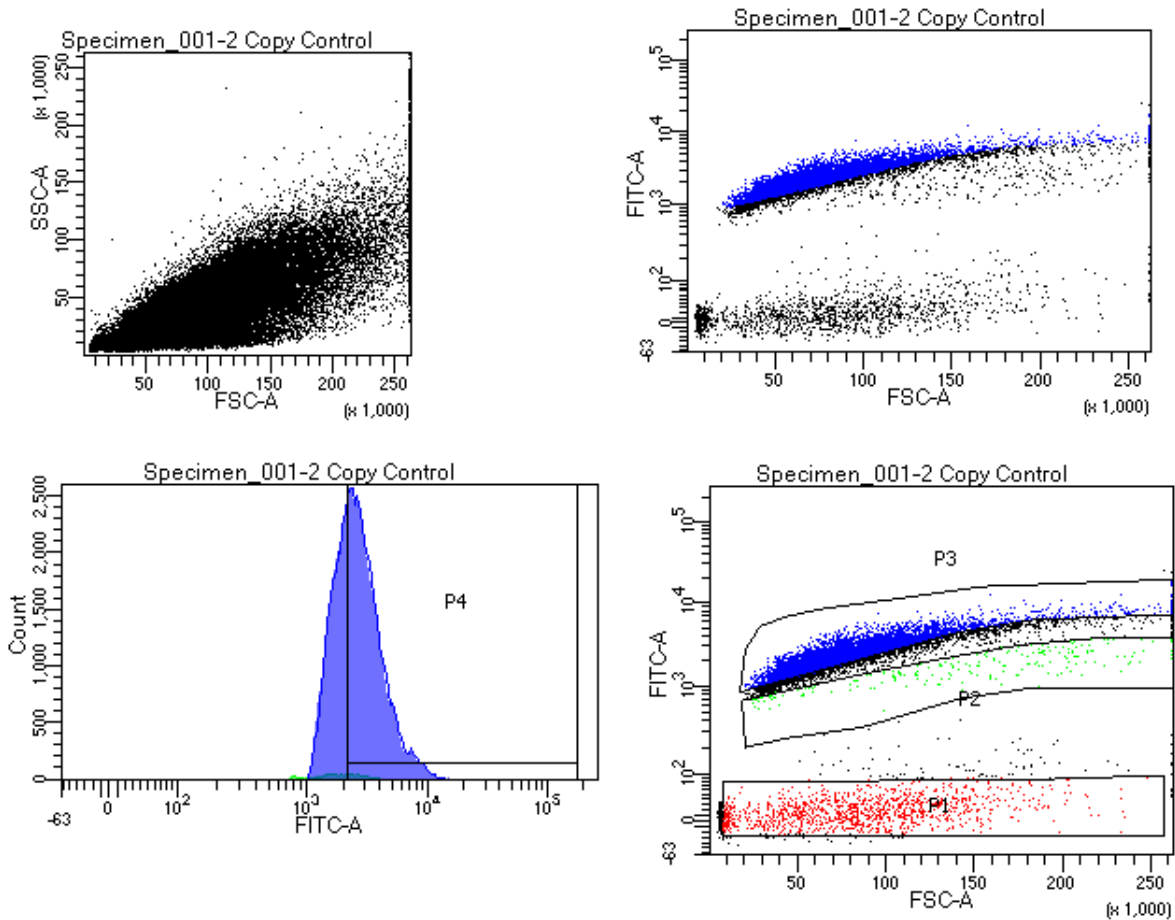

|                  |                          |  |
|------------------|--------------------------|--|
| Experiment Name: | Grace 2017-10-17         |  |
| Specimen Name:   | Specimen_001             |  |
| Tube Name:       | 2 Copy Control           |  |
| Record Date:     | Oct 17, 2017 12:37:57 PM |  |
| SOP:             | Administrator            |  |

  

| Population | #Events | %Parent |
|------------|---------|---------|
| All Events | 100,000 | ####    |
| P1         | 11,085  | 11.1    |
| P2         | 2,104   | 2.1     |
| P3         | 68,115  | 68.1    |
| P4         | 49,311  | 49.3    |

|                  |                                     |  |
|------------------|-------------------------------------|--|
| Experiment Name: | Grace 2017-10-17                    |  |
| Specimen Name:   | Specimen_001                        |  |
| Tube Name:       | 2 Copy Control                      |  |
| Record Date:     | Oct 17, 2017 12:37:57 PM            |  |
| SOP:             | Administrator                       |  |
| GUID:            | 47ebd015-ecab-4e1b-89fc-7d21bc89... |  |

  

| Population | #Events | %Parent | FSC-A Mean | FITC-A Mean |
|------------|---------|---------|------------|-------------|
| All Events | 100,000 | ####    | 84,178     | 2,328       |
| P1         | 11,085  | 11.1    | 81,280     | 17          |
| P2         | 2,104   | 2.1     | 147,923    | 1,783       |
| P3         | 68,115  | 68.1    | 79,618     | 2,741       |
| P4         | 49,311  | 49.3    | 108,183    | 3,559       |

S)

BD FACSDiva 8.0.2

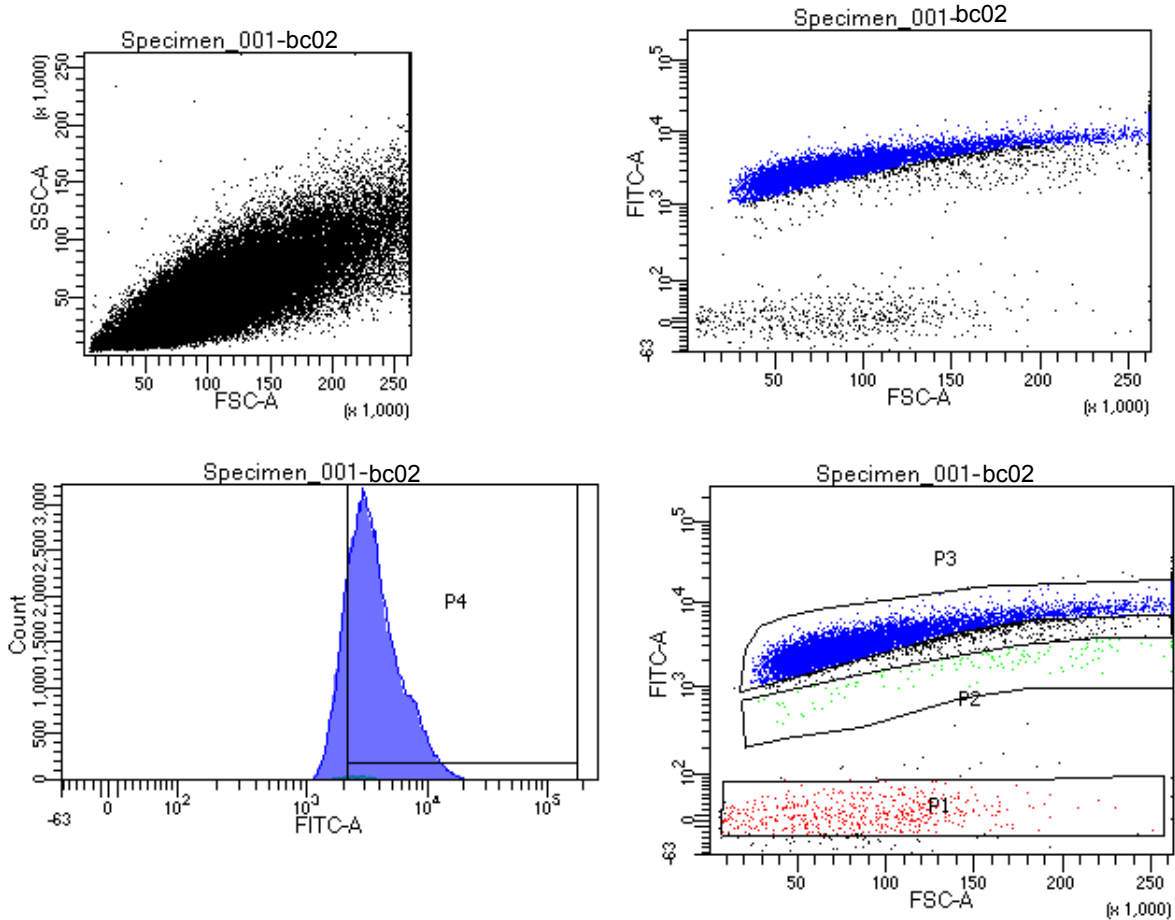

|                  |                          |  |
|------------------|--------------------------|--|
| Experiment Name: | Grace 2017-10-17         |  |
| Specimen Name:   | Specimen_001             |  |
| Tube Name:       | bc02                     |  |
| Record Date:     | Oct 17, 2017 12:50:58 PM |  |
| SOP:             | Administrator            |  |

  

| Population | #Events | %Parent |
|------------|---------|---------|
| All Events | 100,000 | ####    |
| P1         | 5,073   | 5.1     |
| P2         | 1,455   | 1.5     |
| P3         | 86,734  | 86.7    |
| P4         | 75,646  | 75.6    |

|                  |                                      |  |
|------------------|--------------------------------------|--|
| Experiment Name: | Grace 2017-10-17                     |  |
| Specimen Name:   | Specimen_001                         |  |
| Tube Name:       | bc02                                 |  |
| Record Date:     | Oct 17, 2017 12:50:58 PM             |  |
| SOP:             | Administrator                        |  |
| GUID:            | 52ad62b0-fd39-440f-98ad-32e02a10f... |  |

  

| Population | #Events | %Parent | FSC-A Mean | FITC-A Mean |
|------------|---------|---------|------------|-------------|
| All Events | 100,000 | ####    | 96,203     | 3,544       |
| P1         | 5,073   | 5.1     | 90,265     | 14          |
| P2         | 1,455   | 1.5     | 157,290    | 1,977       |
| P3         | 86,734  | 86.7    | 91,870     | 3,756       |
| P4         | 75,646  | 75.6    | 107,318    | 4,264       |

T)

BD FACSDiva 8.0.2

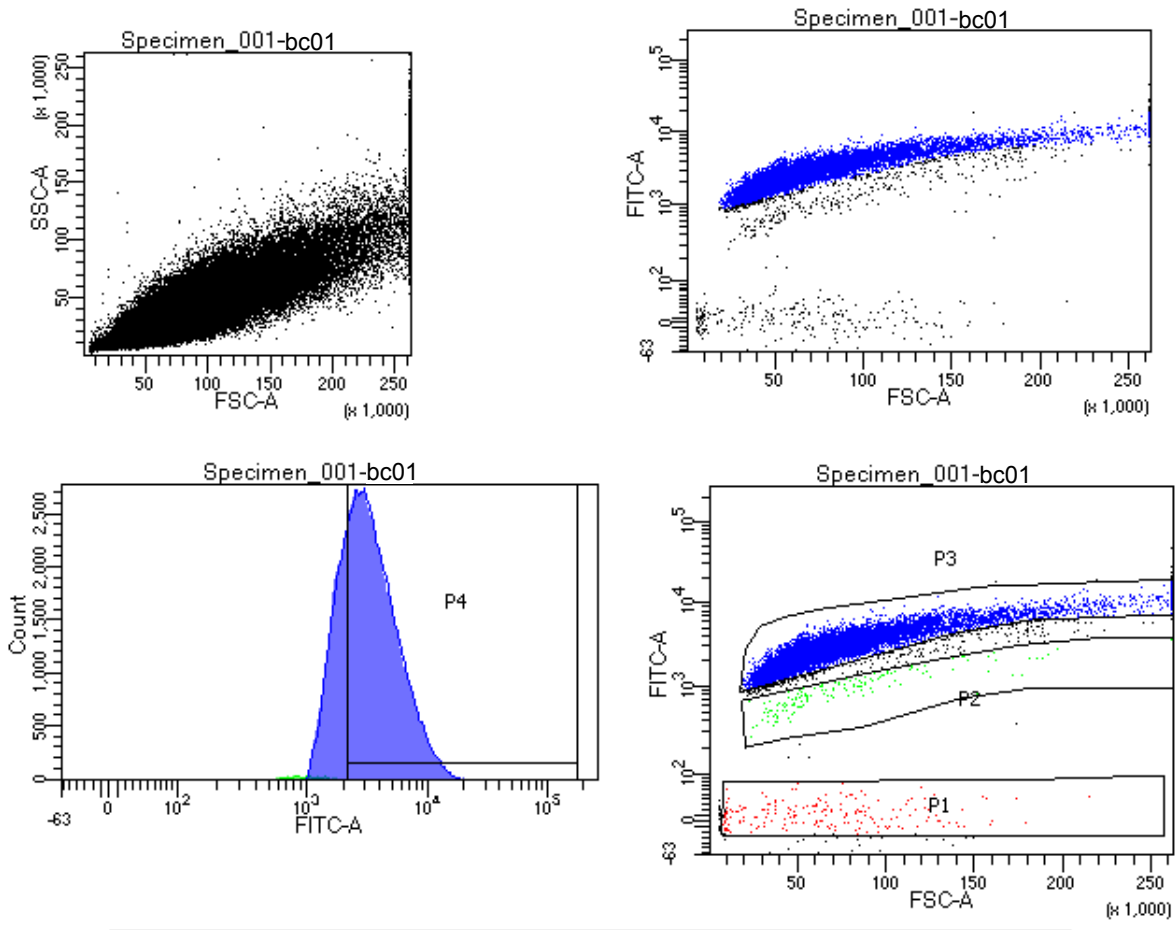

|                  |                         |  |
|------------------|-------------------------|--|
| Experiment Name: | Grace 2017-10-17        |  |
| Specimen Name:   | Specimen_001            |  |
| Tube Name:       | bc01                    |  |
| Record Date:     | Oct 17, 2017 1:10:29 PM |  |
| SOP:             | Administrator           |  |

  

| Population | #Events | %Parent |
|------------|---------|---------|
| All Events | 100,000 | ####    |
| P1         | 1,912   | 1.9     |
| P2         | 1,484   | 1.5     |
| P3         | 92,764  | 92.8    |
| P4         | 68,500  | 68.5    |

|                  |                                      |  |
|------------------|--------------------------------------|--|
| Experiment Name: | Grace 2017-10-17                     |  |
| Specimen Name:   | Specimen_001                         |  |
| Tube Name:       | bc01                                 |  |
| Record Date:     | Oct 17, 2017 1:10:29 PM              |  |
| SOP:             | Administrator                        |  |
| GUID:            | 4fda0ad0-304d-419a-9f2c-74fb87462... |  |

  

| Population | #Events | %Parent | FSC-A Mean | FITC-A Mean |
|------------|---------|---------|------------|-------------|
| All Events | 100,000 | ####    | 80,551     | 3,357       |
| P1         | 1,912   | 1.9     | 65,353     | 14          |
| P2         | 1,484   | 1.5     | 85,487     | 1,121       |
| P3         | 92,764  | 92.8    | 80,044     | 3,484       |
| P4         | 68,500  | 68.5    | 96,820     | 4,226       |
