# Supplementary material for: Single-cell copy number variant detection reveals the dynamics and diversity of adaptation
Source: PLoS Biol. 2018 Dec 18;16(12):e3000069. doi: 10.1371/journal.pbio.3000069 (PMC6298651; doi:10.1371/journal.pbio.3000069)
Supplement: S11 Table — Summary statistics are defined as in Table 1. Data and code used to generate this table can be accessed in OSF: https://osf.io/fxhze/. CNV, copy number variant. (XLSX) [file pbio.3000069.s028.xlsx]

## Sheet: Sheet1
Sample ID	(Tup) Time of initial detection	1 + Sup ± SE	95% CI Sup	95% CI Sup	Sup Range	Max %	(Tmax) Time to max frequency	g70 %	g90 %	g150 %	g270 %	Monotonic
gln_bc01	50	1.124 ± 0.0052	0.109618	0.138682	37-79	0.96	273	0.605881	0.815271	0.903229	0.959551	yes
gln_bc02	54	1.073 ± 0.0024	0.0675506	0.0780753	29-124	0.96	182	0.300587	0.590405	0.952656	0.9224	yes
gln_bc03	41	1.065 ± 0.0046	0.0536589	0.0762379	29-87	0.73	140	0.386429	0.522682	0.710799	0.44381	no
gln_bc04	50	1.069 ± 0.0046	0.0573627	0.0796448	21-79	0.6	207	0.237246	0.315078	0.482558	0.378444	no
gln_bc05	50	1.08 ± 0.0059	0.0658626	0.0949759	29-87	0.75	140	0.399922	0.592606	0.731571	0.0638552	no
gln_bc06	58	1.096 ± 0.0035	0.0872073	0.104202	29-87	0.94	265	0.254154	0.528911	0.779812	0.924252	yes
